# Supplementary material
Source: PubMed Central journal article supplement (PMC3853320)
Supplement: mmc5.pdf [file mmc5.pdf]

# Brownian Dynamics of Subunit Addition-Loss Kinetics and Thermodynamics in Linear Polymer Self-Assembly

Brian T. Castle and David J. Odde\*

Department of Biomedical Engineering, University of Minnesota, Minneapolis, Minnesota

**ABSTRACT** The structure and free energy of multistranded linear polymer ends evolves as individual subunits are added and lost. Thus, the energetic state of the polymer end is not constant, as assembly theory has assumed. Here we utilize a Brownian dynamics approach to simulate the addition and loss of individual subunits at the polymer tip. Using the microtubule as a primary example, we examined how the structure of the polymer tip dictates the rate at which units are added to and lost from individual protofilaments. We find that freely diffusing subunits arrive less frequently to lagging protofilaments but bind more efficiently, such that there is no kinetic difference between leading and lagging protofilaments within a tapered tip. However, local structure at the nanoscale has up to an order-of-magnitude effect on the rate of addition. Thus, the kinetic on-rate constant, integrated across the microtubule tip ( $k_{\text{on,MT}}$ ), is an ensemble average of the varying individual protofilament on-rate constants ( $k_{\text{on,PF}}$ ). Our findings have implications for both catastrophe and rescue of the dynamic microtubule end, and provide a subnanoscale framework for understanding the mechanism of action of microtubule-associated proteins and microtubule-directed drugs. Although we utilize the specific example of the microtubule here, the findings are applicable to multistranded polymers generally.

## INTRODUCTION

Linear biological polymers typically consist of homogeneous globular protein subunits that interact noncovalently to form the functional structure. Examples of linear polymers are diverse and include members of the cytoskeleton, such as microtubules and actin filaments, as well as viruses, sickle-hemoglobin, and paired helical filaments. Because most interactions are noncovalent, both assembly and disassembly are reversible reactions that can be readily controlled and adapted. The adaptability of linear polymers such as microtubules and F-actin enables the congression and subsequent separation of chromosomes during mitosis as well as allows migratory cells to rapidly reorganize cellular protrusions in response to extracellular signals. Because of the importance of the linear polymer assembly dynamics in various cellular processes, they have been studied extensively for several decades both experimentally and theoretically.

Assembly theory for linear polymers assumes that the subunit association and dissociation rates are constant and equal for each strand (1). This theory has been corroborated experimentally, fitting with the observed concentration-dependent net-assembly rates for multistranded polymers such as F-actin (2), GTP-tubulin (3,4), and GMPCPP-tubulin (5,6), enabling estimates of the underlying kinetic rate constants. This model for assembly inherently assumes that the dynamic end of the polymer is energetically constant. However, the structure and free energy of the end evolves because of the formation and loss of lateral interactions as individual subunits are gained and lost from the

end (7). In the simplest form, single-stranded linear polymers have a single longitudinal interaction; however, the increasing complexity of multistranded polymers introduces lateral interactions between neighboring subunits (Fig. 1 A). Thus, despite fitting with experimental results, the assumptions of basic assembly theory break down for more complex multistranded polymers. This was recently shown in microtubule self-assembly where the off-rate ( $k_{\text{off,MT}}$ ) increases as the majority of protofilament ends shift from more stable configurations to less stable configurations at higher free tubulin concentrations (8). Not only did these results have significant consequences for how we view microtubule self-assembly, but also demonstrate that kinetics vary as the structure of the microtubule tip evolves. Thus, the dissociation rate of tubulin subunits is not constant, as theory has assumed.

Hill (7) indicated that both the on- and off-rates will depend on the number of lateral interactions, but concluded that the full effect would be on the off-rate for a diffusion-limited process. In agreement, the majority of theoretical models for microtubule self-assembly have assumed a single on-rate constant ( $k_{\text{on,MT}}$ ) for the microtubule end (9–13). However, Gardner et al. (8) found that an on-rate penalty ( $k_{\text{on,PF2}} = k_{\text{on,PF}}/\delta$ , where  $\delta = 15$ ) to protofilaments with two neighboring protofilaments of greater length, although not necessary to qualitatively match tip taper trends with free tubulin concentration, was necessary to quantitatively match the model-predicted protofilament length variance to that estimated experimentally. Without this penalty, the model predicted a protofilament length variance that is smaller than experimentally observed, meaning all protofilaments are of approximately equal length. This suggests that the evolving tip structure and free energy may affect the on-rate constant in addition to

Submitted July 19, 2013, and accepted for publication October 16, 2013.

\*Correspondence: [oddex002@umn.edu](mailto:oddex002@umn.edu)

Editor: Fazoil Ataulakhonov.

© 2013 by the Biophysical Society  
0006-3495/13/12/2528/13 \$2.00

<http://dx.doi.org/10.1016/j.bpj.2013.10.009>

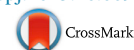

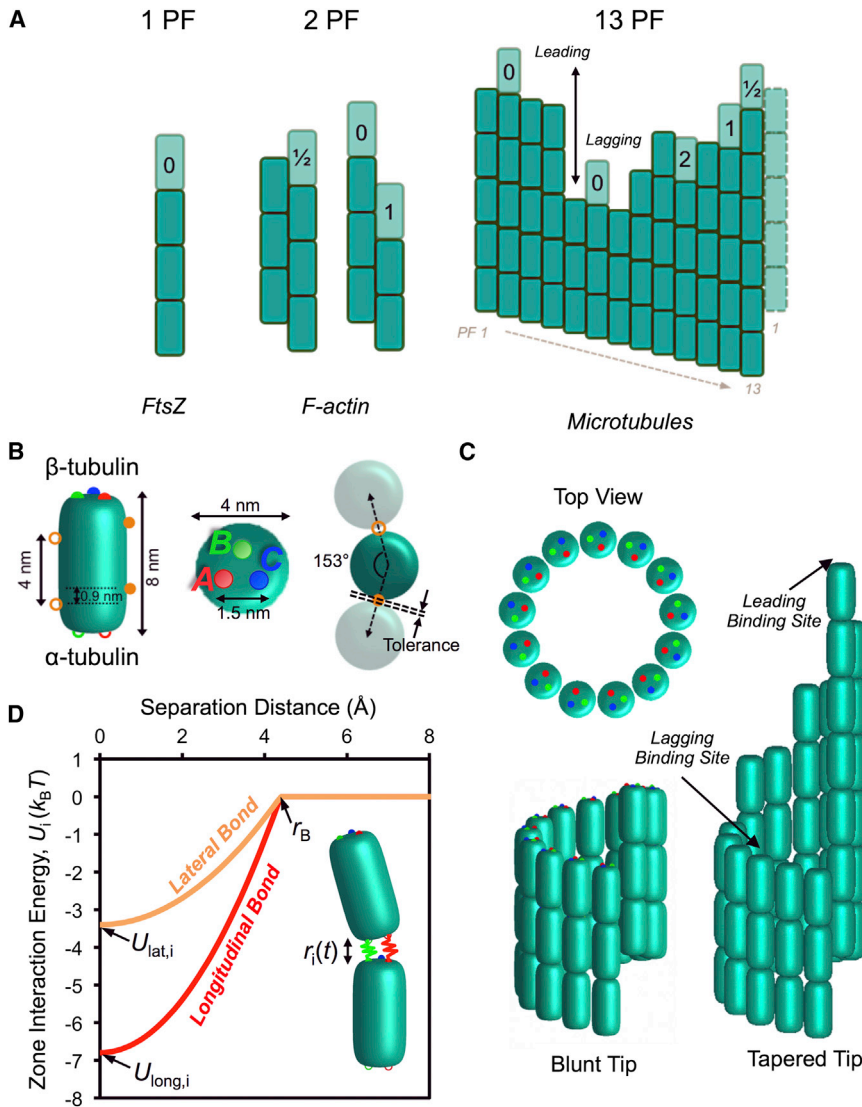

FIGURE 1 Simulated structures and interactions in linear polymer self-assembly. (A) Examples of single and multistranded linear polymers are shown. The number of possible configurations increases with complexity. Darker subunits are bound, whereas lighter subunits represent potential binding sites for incoming subunits. The number of laterally interacting subunits is indicated for each binding site. (B) Diagram of an  $\alpha\beta$ -tubulin subunit assumed within the model. Zones constituting the longitudinal bond are A (red), B (green), and C (blue). Lateral zones (solid and open circles in orange)  $\beta$ - and  $\alpha$ -tubulin, respectively, with colored symbols indicating the paired binding partners on separate subunits (i.e., open green associates with solid green on a separate subunit). (C) Diagram of the microtubule lattice as constructed within the simulation. Tapered example (right) is four dimer layers. (D) Interaction energy as a function of separation distance is shown for a single longitudinal (red, one of three zones) and lateral bond (orange, one of two zones) zone. Interaction energy increases as a Hookean spring within the binding radius ( $r_B$ ).

the off-rate and that kinetic or thermodynamic inequality at the microtubule end may be necessary to produce the experimentally observed structures (14,15). More generally, multistranded self-assembled polymers, in principle, could have different on-rate constants for each protofilament; however, we currently lack the theoretical underpinnings for on-rate heterogeneity, or whether it is even expected to exist.

To explain the specific case of microtubule tip structure and self-assembly, Gardner et al. (8) imposed an on-rate penalty only to protofilaments with two neighboring protofilaments of greater length and ignored any penalty imposed by a single neighboring protofilament. Even so, a single neighbor may be sufficient to hinder subunit incorporation into the lattice. As the microtubule grows, the tip becomes increasingly tapered (14,16), in which the one-neighbor case will be the most frequent. Thus, a one-neighbor penalty could significantly influence net assembly and the resulting

structure of the microtubule tip, as well as influence assembly in multistranded linear polymers generally. Gardner et al. (8) assumed the presence of neighboring protofilaments is unfavorable due to the steric hindrance of aligning incoming units with the orientation of adjacent protofilaments, although the presence of neighboring protofilaments could also be favorable due to the additional free energy of forming lateral bonds. Thus, the net-effect of laterally interacting protofilaments at the end of linear polymers is not clear.

In addition to local effects of neighboring protofilaments, the global structure or the distribution of protofilament lengths at the end of the microtubule could influence the kinetics of individual protofilaments, independent of the local conditions. Individual protofilaments vary in length within a microtubule (often referred to as tip taper or raggedness), and often range up to several hundred nanometers both in vitro (14) and in vivo (15).

The tip structures in many cases appear much like the tip of a syringe needle (i.e., like a cylinder cut obliquely; see e.g., Chréti n et al. (14)). The extended leading protofilaments potentially block freely diffusing subunits from reaching shorter lagging protofilaments, thus the rate by which free subunits arrive to a potential binding site could depend upon its global position within the microtubule tip structure.

To investigate the impact of polymer-end structure on kinetics and thermodynamics of linear polymer self-assembly generally, we created a Brownian dynamics computational model for the noncovalent interactions of subunits with the polymer tip. This allowed us to simulate the association and dissociation of individual subunits, using microtubule assembly as a central focus. We found that due to counteracting effects, global structure of the extending tip does not affect the association rate to lagging protofilaments compared to leading protofilaments, assuming there are no lateral neighbors. However, local presence of either one or two neighboring protofilaments inhibits the association despite the presence of short-range favorable interactions. These results demonstrate that the association rate constant for the microtubule ( $k_{\text{on,MT}}$ ) should be considered an ensemble average of the individual nanoscale rate constants of individual protofilaments ( $k_{\text{on,PF}}$ ), which are dependent on the number of lateral interactions at the polymer end and evolve with the gain and loss of individual subunits. Additionally, our model serves as a framework to study the specific mechanisms by which microtubule-associated proteins and microtubule-targeting drugs affect the microscale microtubule dynamics through alteration of the underlying kinetics and thermodynamics. To our knowledge, this is the first intermediate-scale simulation of subunit association and dissociation in linear filament self-assembly where the translational and rotational dynamics of subunits are explicitly simulated along with the interaction potentials between subunits. This modeling approach, based on the method articulated by Northrup and Erickson (17), provides a bridge from the atomistic method (18–22) and simple addition-loss methods (9–12,23,24).

## METHODS

Our model was based on the Brownian dynamics approach described by Northrup and Erickson (17) for estimating kinetic association rate constants, with the following modifications:

1. Nonspherical subunit structure;
2. Interaction with a self-assembled polymer lattice; and
3. Separate near- and far-field simulations to isolate effects on either diffusion-limited arrivals or binding.

Additionally, we implement a modified Metropolis Monte Carlo (25) algorithm for Brownian dynamics in the presence of an external force. All simulations were carried out with custom code written in the software MATLAB (The MathWorks, Natick MA). To test the model predictions, we implemented two specific linear self-assembled polymer structures: microtubules and actin filaments. Simulated structures and interactions are

described below. For a detailed description of the simulation procedure, see the [Supporting Material](#).

## Microtubule simulation structures

The microtubule structure was modeled as a B-lattice, consisting of 13 protofilaments and a helical pitch of 1 1/2 dimers per turn (Fig. 1). Individual tubulin subunits were modeled as superellipsoids, obtained by rotating the Lam  curve

$$\left| \frac{x}{a} \right|^n + \left| \frac{y}{b} \right|^n = 1, \quad (1)$$

with  $a = 2$  nm,  $b = 4$  nm, and  $n = 5$ , about the vertical axis (Fig. 1 B). For a blunt tip, each protofilament consisted of 100 dimers to capture any potential long-range effects and to create variable tip structures through the removal of dimers from the lattice. To create a tapered tip, the first protofilament was 100 dimers in length and the dimer number decreased linearly between protofilaments 1 and 10, which was of equal length to protofilaments 11–13 (Fig. 1 C). Protofilament 11 was then used as the protofilament of interest for simulations of lagging protofilaments to insure that immediately adjacent protofilaments were of equal length. Lag distance was defined as the center-to-center distance between the subunit of interest and either the most distal subunit (when lagging, positive-lag distance) or the closest subunit on a separate protofilament (when leading, negative-lag distance). In simulations where the protofilaments adjacent to the protofilament of interest were of greater length (lateral neighbors), protofilament 7 of a blunt end was used and subunits were then added to one or both of protofilaments 6 and 8 to create the one- and two-neighbor cases, respectively. We define the tolerance of lateral neighbors as the minimum distance (surface-to-surface) between adjacent subunits within the microtubule lattice (Fig. 1 B). Tolerance was adjusted by modifying the radius of the microtubule and keeping the dimensions of individual subunits constant.

## Longitudinal and lateral interactions between subunits

To represent the longitudinal bonds between freely diffusing subunits and the protofilament of interest, we used three zones based on the high-resolution description of tubulin subunits within the microtubule lattice (26) (Fig. 1 B). Three zones would be the minimum number necessary for correct rotational orientation to allow for lateral interactions, and is the number of contacts that best matched experimental estimates of kinetic association rates according to Northrup and Erickson (17). The three zones (A, B, and C) were placed noncollinearly in a plane (i.e., in a triangle), tangential to the end of the subunit, normal to and centered on the subunit long axis on both the  $\alpha$ - and  $\beta$ -tubulin ends of the dimer (Fig. 1 B). Zones were paired, and mutually exclusive, such that zone A of  $\alpha$ -tubulin could only bind with zone A of  $\beta$ -tubulin on the subunit of interest. Zones were rotated about the vertical (long) axis so that their position relative to the inside or outside of the microtubule lattice was independent of protofilament number (e.g., Zone A, red, is always located near the inside face of the microtubule, as in Fig. 1 C).

Two zones, one  $\alpha$  and one  $\beta$ , were used to model the lateral bonds between subunits (Fig. 1 B), which was sufficient to ensure that subunits were aligned vertically with neighboring protofilaments. Similar to longitudinal bonds, lateral zones were paired and mutually exclusive. Because of the helical and cylindrical shape of the microtubule lattice, lateral zones were offset from center on either side of the tubulin subunit and rotated inward toward the microtubule lumen (Fig. 1 B). Accounting for both the helical pitch and cylindrical shape of the microtubule lattice minimized the distance between lateral zones when a subunit was bound within the lattice.

Bonds were modeled as Hookean springs of zero rest length with a well-depth equal to the total bond energy for an individual zone (Fig. 1 D). Thus,

the energy at each time point was the difference between the total potential energy and the displacement of stretching the spring, given by the harmonic potential

$$U_i(t_j) = \frac{1}{2} k_{\text{bond},i} (r_i(t_j))^2 + U_{\text{bond},i}, \quad (2)$$

where  $r_i$  is the distance between paired zones and  $k_{\text{bond},i}$  is the spring constant of an individual interaction zone. Individual zones were modeled as springs in parallel and the total bond potential energy was evenly distributed across all zones, such that  $k_{\text{bond},i} = k_{\text{bond}}/q$  and  $U_{\text{bond},i} = U_{\text{bond}}/q$  (where  $q = 3$  for the longitudinal bond and  $q = 2$  for lateral bond). We assumed  $k_{\text{long}}$  was equal to that previously estimated for the longitudinal bond modeled as a harmonic potential ( $k_{\text{long}} \approx 900$  pN/nm) (12). We initially established bounds for the total longitudinal bond potential energy ( $U_{\text{long}}$ ) (see the Supporting Material), but later found that  $U_{\text{long}} = -20.4 k_B T$  resulted in  $\Delta G_{\text{long}}^0 = -6.8 k_B T$  (see Results and Discussion), consistent with that previously estimated for the longitudinal bond free energy (11). Therefore, this value of  $U_{\text{long}}$  was used for the longitudinal bond in all simulations unless otherwise noted.

Several studies have noted that the intrinsic bond energy of the lateral bond is weaker (more positive) than the longitudinal bond by  $\sim 12$ – $16 k_B T$  (11,20,27). To account for this difference, we assumed that the total bond energy for the lateral bond was one-third that of the longitudinal bond ( $U_{\text{lat}} = -20.4/3 k_B T = -6.8 k_B T$ ), thus weakening the lateral bond by  $\sim 14 k_B T$ . Additionally, the spring constant of the lateral bond was three-times softer than the longitudinal bond ( $k_{\text{lat}} = k_{\text{long}}/3$ ) to account for the flexible M-loop involved in the lateral contact between tubulin subunits (26). Softening the lateral bond also made the binding radius ( $r_B$ ) equal for both the longitudinal and lateral bond. A bond was considered broken when the strain of stretching was greater than the total bond energy. This separation distance (where  $U_i(t_j) = 0$ ) was defined as the binding radius ( $r_B$ ) and given by

$$r_B = \left( \frac{-2U_{\text{bond},i}}{k_{\text{bond},i}} \right)^{1/2}. \quad (3)$$

Based on the bond strengths and stiffness values indicated above,  $r_B = 0.43$  nm. Individual zones were considered bound when their separation distance was less than the binding radius (Fig. 1 D), and only those zones that were bound contributed to the total energy at a given time point according to

$$U(t_j) = \sum_{i=1}^N U_i(t_j), \quad (4)$$

where  $N$  is the number of zones within  $r_B$  (the longitudinal and lateral zones both contribute to the value of  $N$ , such that  $\max(N) = 3, 5,$  or  $7$  with zero, one, or two lateral bonds). A subunit was considered completely bound when all three zones constituting the longitudinal bond were within  $r_B$  ( $N = 3$  for longitudinal bond).

## Actin filaments

To simulate actin (instead of tubulin), we assumed G-actin monomers were superellipsoids with dimensions of  $4 \times 4 \times 6.7$  nm ( $a = 2$  nm and  $b = 3.35$  nm in Eq. 1), comparable to de la Cruz et al. (28), and that the protofilaments of F-actin were offset by 2.8 nm (29). Protofilaments were 100 subunits in length, and then subunits were added to the leading protofilament to increase the lag distance of the lagging protofilament. We found a total bond energy of  $U_{\text{long}} = -19.2 k_B T$  best fit estimates of the standard Gibbs free energy for the longitudinal bond (30). Additionally, we adjusted the stiffness of the longitudinal bond based on previous estimates for ATP-actin ( $k_{\text{long}} = 165 k_B T/\text{nm}^2 \approx 700$  pN/nm) (28). Modifying the total bond

energy and bond stiffness only slightly changed the binding radius ( $r_B = 0.46$  nm) compared to tubulin. To include the diagonal bonds between actin monomers, we used a single interaction zone per diagonal bond with  $U_{\text{diag}} = -6.4 k_B T$  and  $k_{\text{diag}} = k_{\text{long}}$ .

## RESULTS AND DISCUSSION

### Global position has no net effect on kinetics

We anticipated two potential effects of global and local tip conditions, either 1), reducing the rate at which freely diffusing tubulin subunits arrive (through diffusion) to a surface some short distance away from the protofilament of interest or 2), inhibiting the subsequent binding. To isolate these two potential effects, we split our simulation into two parts (see the Supporting Material), initially simulating the diffusion-limited arrival rate to a surface a short distance from the bound subunit of interest ( $k_D(R)$ , where  $R = 10$  nm center-to-center; Fig. 2 A), and then simulating the

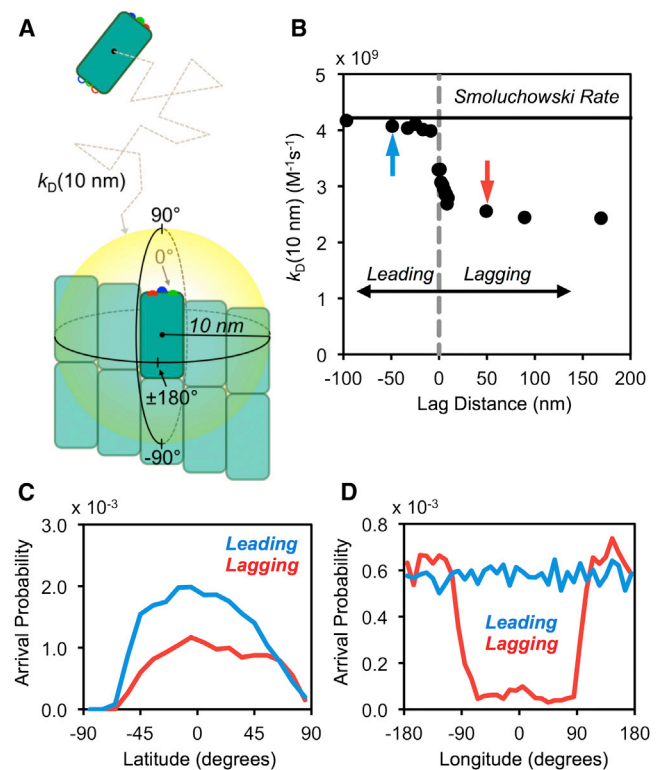

FIGURE 2 Diffusion-limited arrivals to leading and lagging protofilaments. (A) Freely diffusing subunits arrive to a spherical surface ( $R = 10$  nm, yellow) centered on the leading subunit of the protofilament of interest. Darker subunits identify potential binding partners (subunits of interest), whereas lighter subunits show the immediately surrounding microtubule lattice. (B) Diffusion-limited arrivals to protofilaments at varying global positions within the microtubule tip. (Solid black line) Theoretical Smoluchowski limit to the yellow sphere shown in panel A ( $4\pi D_{\text{avg}} R$ ). (Gray vertical line) Zero lag. (Blue and red arrows) Leading (blue) and lagging (red) cases shown in panels C and D. (C and D) Probability that a freely diffusing subunit (starting from  $R = 400$  nm) reaches the 10-nm surface at a given position relative to the subunit of interest within the microtubule lattice.

subsequent binding of units that arrived at this surface. As shown in Fig. 2 B, freely diffusing subunits approach lagging protofilaments at a slower rate compared to leading protofilaments. The arrival rate to leading protofilaments rapidly approaches the predicted Smoluchowski rate (see Eq. S8 in the Supporting Material), whereas the arrival rate to lagging protofilaments is approximately twofold slower. Interestingly, once a protofilament is leading or lagging by a certain distance (on the order of a single subunit layer), there is relatively little change in the rate (Fig. 2 B). The greatest change in rate occurs around zero lag, indicating that only small differences in the relative length of individual protofilaments are necessary to reduce the arrival frequency of freely diffusing subunits. This suggests that global structure would have similar implications in other multistranded polymers that exhibit less variation in protofilament lengths, such as F-actin.

To more specifically examine the cause of reduced arrivals to lagging protofilaments, we looked at the positions of arriving units (that reach the 10-nm center-to-center distance) relative to the subunit of interest within the microtubule lattice (Fig. 2, C and D). Although there was no apparent spatial bias in the reduction of arrivals above or below the subunit of interest, we found that fewer subunits arrive to lagging protofilaments from the direction of the inside (lumen) of the microtubule compared to leading protofilaments (Fig. 2 D). This supports our original hypothesis that longer protofilaments shield lagging protofilaments, but the fact that the observed effect starts at  $\sim \pm 90^\circ$  longitude further suggests that the observed effect is in part due to the neighboring protofilaments of nearly equal length. If adjacent protofilaments were the only effect on diffusion-limited arrivals, we expect there would be no difference among protofilaments 2–11 in a blunt tip, as the local conditions are equivalent for each. As seen in Fig. 2 B, however, protofilaments 2–11 (lag distance  $\sim 0$ –8 nm) exhibit the greatest absolute rate of change in arrival rate. These results together indicate that the global structure mainly reduces arrivals to lagging protofilaments by blocking the angles from which freely diffusing subunits can approach the binding site.

If the efficiency of binding is independent of the global tip structure, then our estimated on-rate constant for lagging protofilaments should be lower than that for leading protofilaments. As shown in Fig. 3 A, however, binding efficiency is not independent of the global position and exhibits the opposite trend compared to arrivals. This means that freely diffusing dimers, once they have gotten to within a few nanometers of the binding site, are more likely to bind to lagging protofilaments than leading protofilaments. The observed trend in binding efficiency effectively cancels out the trend in diffusion-limited arrivals, such that the on-rate constant is independent of the global position of the binding site within the microtubule tip (Fig. 3 B). The same trend in binding efficiency was observed when starting

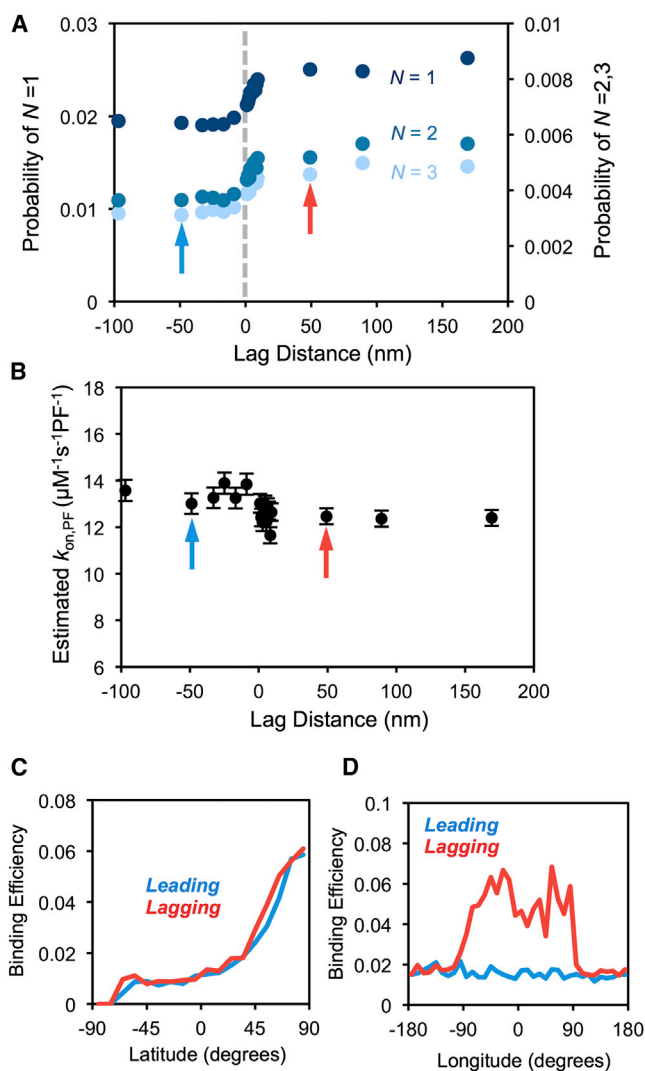

FIGURE 3 Binding efficiencies and estimated on-rate constants for varying global positions. (A) The probability that subunits satisfy  $N = 1$  (dark blue dots),  $N = 2$  (blue dots), or  $N = 3$  (light blue dots) longitudinal zones within  $r_B$  before diffusing to 400-nm center-to-center distance. (Gray line) Zero lag. (B) Estimated on-rate constants of completely bound subunits ( $N = 3$ ) for a variety of global positions. In panels A and B, the arrows indicate the leading (blue) and lagging (red) cases analyzed in panels C and D. Error bars are mean  $\pm$  SE. (C and D) Binding efficiencies of all arrival positions are shown. Efficiency is the number of subunits per position that eventually bind before diffusing to 400-nm center-to-center distance divided by the total number of simulations initiated at that position.

positions were artificially randomized along the 10-nm surface rather than sampled from the diffusive arrivals (see Fig. S2 in the Supporting Material). Therefore, the observed trend in binding efficiency was not due to bias in the starting positions but due, instead, to an inherent property of lagging versus leading protofilaments.

The fact that the trend is observed for each degree of contact specificity ( $N = 1, 2$ , and 3) indicates that the global structure does not promote the transition to a higher degree of binding, but instead increases the chance that a single

contact is established in the first place (Fig. 3 A). Note that the percentage of freely diffusing subunits that reach the  $N = 1$  state is very small (2–3%), thus even though they arrive at a very short distance (10-nm surface) relative to the binding site, the vast majority of subunits diffuse away without ever interacting with the protofilament of interest. Subunits arriving above the binding site are more efficient for both leading and lagging protofilaments; however, those arriving from the direction of the microtubule lumen are approximately three times more efficient when binding to lagging versus leading (Fig. 3, C and D). Thus, even though fewer freely diffusing subunits reach lagging protofilaments from the direction of the inner part of the microtubule (Fig. 2 D), those units are more likely to interact with the protofilament of interest and eventually incorporate into the lattice. These results together suggest that the surrounding longer protofilaments in the lagging case keep free units from escaping, in the same manner that they blocked units from arriving in the first place, thus increasing the probability that the free unit establishes at least one interaction contact. Thus, the extending global tip structure is like a double-edged sword that simultaneously blocks subunit arrivals to and departures from the vicinity of lagging protofilaments, such that leading and lagging protofilaments end up with essentially the same on-rate constant.

### Local structure sterically inhibits subunit association

Although global structure did not affect subunit addition, we were interested to see whether local structure might—an effect invoked to quantitatively explain microtubule tip structure in a previous study (8). In a multistranded self-assembled polymer, lateral interactions are formed and lost as a consequence of the gain and loss of individual subunits at the dynamic end of the microtubule, and thus the local conditions for a given protofilament will vary over time. For a multistranded polymer with at least three protofilaments, there are three conditions that an incoming subunit could encounter (7). The protofilament of interest could have zero, one, or two neighboring protofilaments that are longer by at least one subunit. In contrast to global structures, the potential effects of local structures are more immediately apparent. For example, in the case with two adjacent longer protofilaments, an incoming unit would have less freedom of orientation due to the steric hindrance of the neighboring protofilaments. Based on these arguments, Gardner et al. (8) implemented an on-rate penalty (15-fold decrease of the association rate constant,  $k_{\text{on,PF}}$ ) to protofilaments with two neighboring protofilaments of greater length to replicate the experimentally observed protofilament length variance. Here we sought to use our Brownian dynamics model to investigate whether a single neighboring protofilament of greater length could induce a

similar penalty and to obtain a more rigorous estimate of what the two-neighbor penalty should be, if any.

We defined local tip structure as the relative lengths of an individual protofilament to its immediately adjacent neighboring protofilaments (Fig. 1 A). In our simulation, a blunt tip (zero lateral neighbors) assumes both neighboring protofilaments are the same length as the protofilament of interest. The one- and two-lateral-neighbor cases are where one or two adjacent protofilaments, respectively, are longer by at least a single dimer. As seen in Fig. 4 A, our estimated on-rate constant decreases progressively with the addition of one and two lateral neighbors. Thus, the on-rate constant for a protofilament in each condition will be penalized relative to the zero neighbor case. This observation was robust with respect to the details of the shape of the potential as well as the bond stiffness (see Fig. S6). Although we assume that all protofilaments are oriented parallel to the microtubule axis,

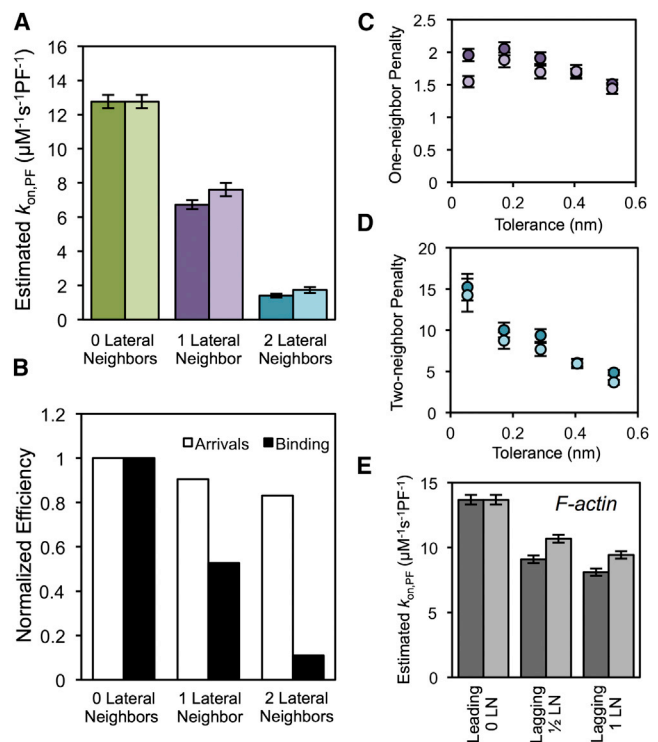

FIGURE 4 Dependence of on-rate constants on local tip structure. (A) Estimated on-rate constants of freely diffusing subunits for all possible local configurations are shown. Rates for simulations with (lighter) and without (darker) the lateral bond result in equivalent estimates of the on-rate constant. (B) Efficiency of diffusive arrivals to 10-nm center-to-center distance and subsequent binding are shown. Each is normalized to the respective zero neighbor case. (C and D) On-rate penalties (fold decrease from the zero neighbor case) for the single- (C) and two- (D) neighbor cases with (lighter) and without (darker) lateral bonds. Penalties were estimated across a range of tolerances, where tolerance is defined as the minimum distance between adjacent protofilaments within the microtubule lattice. (E) Estimated on-rate constants of G-actin binding to the leading and lagging protofilament are shown (lateral neighbor numbers are illustrated in Fig. 1 A) for simulations with (lighter) and without (darker) the diagonal bonds. All error bars are mean  $\pm$  SE.

the gentle outward curling of leading protofilaments in growing ends (14) is not likely to reduce the steric penalty because a single dimer layer is sufficient to impose the penalty. In contrast to global structures, these local structures have little effect (<20% between zero and two neighbors) on the arrival of freely diffusing subunits. Instead, the main effect of local structure is through inhibition of the eventual binding of subunits after they have approached the protofilament of interest (Fig. 4 B and see Movie S1 and Movie S2 in the Supporting Material). This is consistent with a steric penalty, due to the constraint of orientation, imposed by the adjacent protofilaments.

If the penalty to the one- and two-neighbor case is indeed due to steric hindrance, then the more severe the orientation constraint, the greater the penalty should be. Therefore, we estimated the one and two-neighbor penalties for a range of tolerances to examine the constraint sensitivity of each penalty (Fig. 4, C and D). Not surprisingly, the two-neighbor case is penalized to a greater extent compared to the one-neighbor case for all tolerances within the range we examined. The one-neighbor penalty is relatively independent of tolerance whereas the two-neighbor penalty becomes more severe at lower tolerances. If we assume that the tolerance range for a microtubule is within the lateral interaction distance defined by Nogales et al. (26) ( $<4 \text{ \AA}$ ), then protofilaments with one or two lateral neighbors will have  $\sim 2$  or  $\sim 10$  times, respectively, slower on-rate constants than those without neighbors. While our estimated on-rate constant for the blunt case is greater than previous estimates, the one-neighbor case is within error of previous estimates (see Gardner et al. (8) for summary). It is interesting to note that a binding site with a single lateral neighbor will be common within a tapered tip, thus the average association constant ( $k_{\text{on,MT}}$ ) estimated from our model is within the range of previous estimates by both experimental and computational approaches (8).

As subunits get close to the binding position, it is possible that the lateral bond will reduce the steric penalty by providing additional favorable free energy, particularly in the presence of two lateral protofilaments. To examine whether this is expected to be a significant effect, we added the lateral bond consisting of two zones (one for  $\alpha$ - and  $\beta$ -tubulin each) on both sides of the  $\alpha\beta$ -tubulin subunit (Fig. 1 B). We decreased both the total bond energy and the spring constant of the lateral bond threefold compared to the longitudinal bond (see Methods). Doing so resulted in the lateral bond being  $\sim 14 k_B T$  weaker than the longitudinal (consistent with published estimates (11,20,27)) and made the binding radius ( $r_B$ ) equal for both the longitudinal and lateral bond, giving the lateral bond the best chance to reduce the on-rate penalty. Even so, the lateral bond did not significantly reduce the severity of the one- and two-neighbor penalties for the majority of tolerances examined (Fig. 4, C and D). Because the lateral bond is so weak compared to the longitudinal, the interaction is not sufficient

to facilitate the establishment of a longitudinal interaction. This suggests that the longitudinal bond is necessary for a subunit to incorporate into the microtubule lattice (the relative strengths of the lateral and longitudinal bond are discussed further below).

The fact that even one neighbor is sufficient to inhibit the association of incoming subunits suggests that a similar effect will occur in all multistranded polymers. Even in a two-stranded polymer, such as F-actin, one protofilament will be longer than the other, resulting in multiple local structure conditions for incoming subunits (Fig. 1 A). To assess the generality of structurally induced kinetic penalties in linear polymer assembly, we simulated G-actin monomer subunit binding to the leading and lagging protofilament of a two-protofilament polymer. In simulating actin instead of tubulin, we shortened the long axis of the super-ellipsoid used to define a subunit and adjusted the total bond interaction energies ( $U_{\text{bond}}$ ) and bond stiffness ( $k_{\text{bond}}$ ) to better match previous estimates for actin (see Methods). As seen in Fig. 4 E, the estimated on-rate constant is reduced by  $\sim 1.5$ -fold for the lagging protofilament compared to the leading protofilament. Similar to tubulin, the addition of diagonal bonds did not reduce the steric penalty imposed by the leading protofilament. The effect of one neighbor is not as strong for F-actin compared to the microtubule; however, our results show that neighboring protofilaments sterically hinder addition to lagging protofilaments even in the simple case of a two-stranded polymer.

### Kinetic penalties influence polymer tip structures

Despite the one-neighbor on-rate constant being only a factor-of-two slower compared to zero neighbors, it can potentially have a significant effect on net assembly if it occurs frequently. To investigate the consequence of our predicted on-rate penalties, we examined the resulting microtubule tip structure from simulations of individual microtubule net assembly according to VanBuren et al. (11): without penalties; with only a two-neighbor penalty (8); and with our model-predicted penalties for both one and two lateral neighbors (from Fig. 4, C and D). Without penalties, individual protofilaments remain of approximately equal length and tip structures do not achieve the same extension compared to simulations with penalties (Fig. 5, A and B). A two-neighbor penalty is sufficient to achieve experimentally observed tapers (14), but it typically results in a single protofilament that lags many dimer layers behind the others, which remain of approximately equal length (Fig. 5, A and C). It is unlikely that this single trailing protofilament would be resolved by experimental methods and thus would appear as a relatively blunt tip because the fraction of zero- and one-neighbor cases is comparable to the nonpenalized case (Fig. 5 C). Our estimate of the two-neighbor penalty is comparable to that required for quantitative agreement with the protofilament standard deviation in GMPPCP

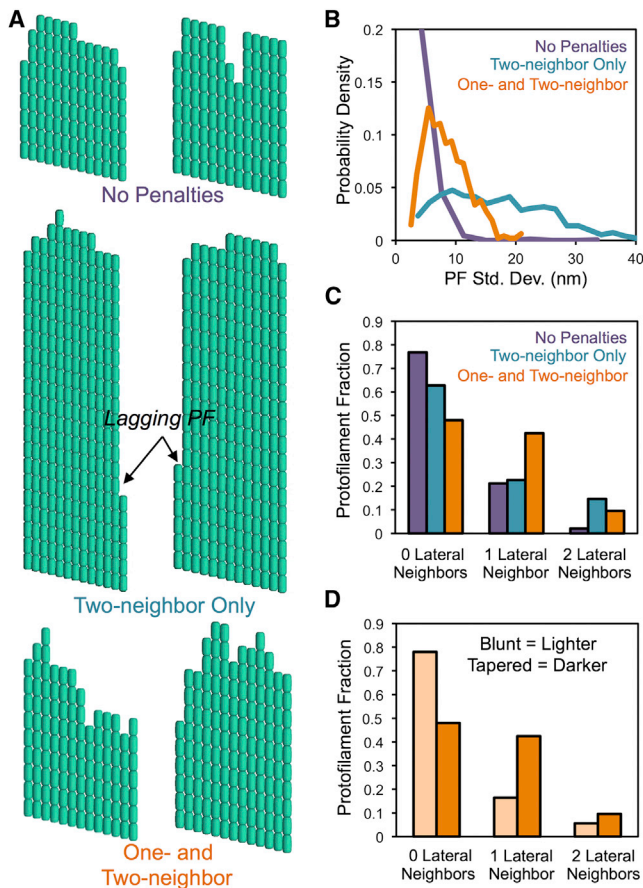

**FIGURE 5** On-rate penalties influence the resulting microtubule tip structure. (A) Examples of tapered microtubule end structures (displayed as two-dimensional sheets) from each of the three simulation conditions: no on-rate penalties (*top*); a single penalty to protofilaments with two lateral neighbors (*middle*); and model predicted penalties to protofilaments with both one and two lateral neighbors (*bottom*). (B) Probability density values of protofilament length standard deviations for tips in each simulation condition are shown. (C and D) The fraction of protofilaments with zero, one, or two lateral neighbors in (C) tapered tips from all three cases and (D) blunt (*lighter*) or tapered (*darker*) tips from simulations with one- and two-neighbor penalties.

microtubules (8). Addition of the one-neighbor penalty, however, resulted in a gradual loss of protofilaments out to the microtubule end, more closely resembling those structures observed by electron microscopy (14,16,31) (Fig. 5 A). Additionally, the one-neighbor penalty shifted the majority of protofilaments from zero neighbors to one and two neighbors in tapered tips compared to blunt (Fig. 5 D). Because the microtubule on-rate constant is determined by the fraction of protofilaments in each condition, tapered tips will have a slower on-rate constant than blunt tips in this case. In fact, we found the average on-rate constant ( $k_{\text{on,MT}}$ ) for the microtubule-end decreased  $\sim 22\%$  in tapered tips compared to blunt in the case with one- and two-neighbor penalties; however, the on-rate constant decreased only  $\sim 7\%$  in the case of a two-neighbor penalty only. Thus, on-rate penalties dictate the resulting tip structure, which will

feed-back to influence association and promote further tapering of the tip.

The observed kinetic inequality between protofilaments due to the local structure provides a potential explanation for the observed history dependence of both catastrophe (16,32,33) and rescue (34). Although it has been shown that gradual tapering of the microtubule tip leads to a higher probability of catastrophe with microtubule age (16), it is not clear how tip taper promotes catastrophe. A potential explanation is that increased taper will correspondingly increase the off-rate ( $k_{\text{off,MT}}$ ) due to the loss of stabilizing lateral bonds (8), thus reducing the net assembly rate. If tip taper only increases  $k_{\text{off,MT}}$ , however, it would be difficult to lose a large GTP-cap at higher tubulin concentrations and as estimated *in vivo* (35). Our results here suggest that, in addition to affecting the off-rate, increasing tip taper will result in a decrease of the average on-rate constant for the microtubule ( $k_{\text{on,MT}}$ ). Thus, the net addition of subunits will potentially decrease to a greater extent and be more variable in time. Because the net assembly rate is the small difference between a large on- and off-rate (8), changes in both  $k_{\text{on,MT}}$  and  $k_{\text{off,MT}}$  could switch the microtubule from a state of net assembly to net disassembly. Thus, a tapered tip will have a net assembly rate that is lower than a blunt tip. We suggest that, rather than there being a series of specific events leading to catastrophe (as indicated by the literature (32,33,36)), gradual tapering of the microtubule tip (16), on average, transitions it to a state of net disassembly, resulting in the loss of the GTP-cap and catastrophe. It may be challenging to experimentally detect this transition, however, because individual tips are highly dynamic (8,16) and variable (14). In contrast to growth, as a microtubule shortens, the tip will evolve toward a blunt structure because of the stability of subunits with two lateral bonds within the microtubule lattice compared to those with one or zero. The transition toward a blunt tip will result in an increase in the net assembly rate, allowing the microtubule to reestablish its GTP-cap and rescue as a result. Thus, the feedback relationship of  $k_{\text{on,MT}}$ ,  $k_{\text{off,MT}}$ , and tip structure can explain history-dependent catastrophe and rescue through the gradual transition between microtubule tip states biased toward net assembly or disassembly.

### Simulating subunit dissociation closes the thermodynamic loop

Because the local tip structure affected the association rate constant, we were interested to assess whether it also affects the dissociation rate constant. For a bimolecular reaction, the standard Gibbs free energy of association ( $\Delta G^0$ ) is related to the ratio of the association and dissociation rate constants by

$$\Delta G^0 = -k_B T \ln(k_{\text{on}}/k_{\text{off}}), \quad (5)$$

where  $k_{\text{on}}$  is defined to have units of  $\text{M}^{-1} \text{s}^{-1}$  and  $k_{\text{off}}$  to have units of  $\text{s}^{-1}$ . Due to the nature of our simulation, we



separated the standard Gibbs free energy into two contributions: the intrinsic bond energy,  $\Delta G_B^0$  (a large negative value assumed here to mainly be the hydrophobic interactions between tubulin subunits in the specific case of the microtubule), and an entropic penalty of binding,  $\Delta G_S^0$  (a positive value due to the loss of translational and rotational freedom upon binding) (27,30,37,38), such that

$$\Delta G^0 = \Delta G_B^0 + \Delta G_S^0. \quad (6)$$

Because we have already simulated the association of freely diffusing subunits, we can obtain a complete thermodynamic picture of  $\alpha\beta$ -tubulin subunits at the dynamic end of microtubules by simulating their subsequent unbinding. We defined the time to unbind as the amount of time that passed between when a subunit is completely bound to when it returns to a center-to-center separation distance where the probability of rebinding is  $<0.01$  ( $R_U = 11$  nm, see the Supporting Material for further discussion and Movie S3).

As noted above (see Methods),  $U_{\text{bond}}$  is not equivalent to  $\Delta G_B^0$ , because for  $\Delta G_B^0 = U_{\text{bond}}$ , all interacting zones have to be perfectly aligned ( $r_i = 0$  for all  $i$ ). This is rarely the case, because one zone's energy decreases at the cost of another zone as the subunit rotates about its center. Instead, we consider  $U_{\text{bond}}$  to be an adjustable parameter that will set the intrinsic bond energy, but is not necessarily equal to it. To estimate  $\Delta G_B^0$  from the simulation, we calculated the time-averaged interaction energy while a subunit was within  $R_U$ , according to

$$\Delta G_B^0 = \frac{\sum_{i=1}^m \sum_{j=0}^{n-1} U(t_j) \cdot (t_{j+1} - t_j)}{\sum_{i=1}^m t_n(i)}, \quad (7)$$

where  $m$  is the total number of unbinding events simulated and  $n$  is the number of steps taken before unbinding for a given unbinding event.

To check that our simulations agreed with theoretical thermodynamic expectations, we estimated  $k_{\text{on,PF}}$ ,  $k_{\text{off}}$ , and  $\Delta G_B^0$  for values of  $U_{\text{long}}$  within the range estimated for the longitudinal bond (see the Supporting Material). From these estimates, we could then estimate  $\Delta G^0$  by Eq. 5 and  $\Delta G_S^0$  from Eq. 6. As shown in Fig. 6, both  $k_{\text{on,PF}}$  and  $k_{\text{off}}$  are dependent on the value of the total bond energy ( $U_{\text{long}}$ ). From this we found that  $U_{\text{long}} = -20.4 k_B T$  resulted in  $\Delta G_{\text{long}}^0 \approx -6.8 k_B T$ , as estimated previously for the longitudinal bond (11) (Fig. 6 C). The intrinsic bond energy ( $\Delta G_B^0$ ) becomes more favorable with decreasing values of  $U_{\text{long}}$ , approaching its value but never equal to it. Our estimated values for  $\Delta G_B^0$  within this range of  $U_{\text{long}}$  are comparable to previous estimates for the intrinsic energy of the longitudinal bond (11,27). Interestingly,  $\Delta G_{\text{long}}^0 > \Delta G_B^0$  for all values of  $U_{\text{bond}}$  (Fig. 6 C). This is due to the loss of translational and rotational freedom introduced by the im-

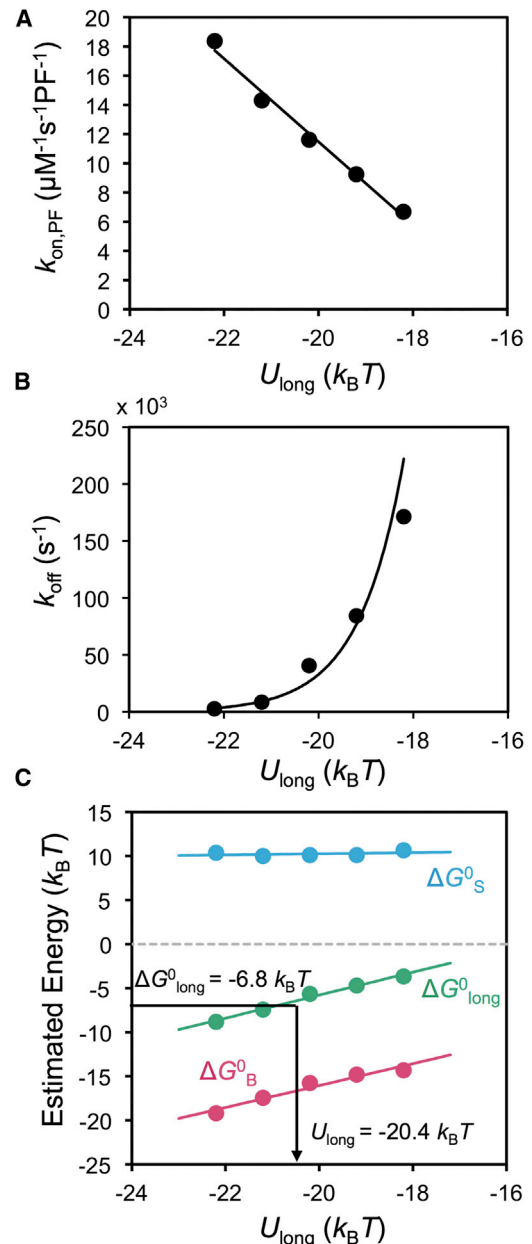

FIGURE 6 Extracting kinetics and thermodynamics from the model. The estimated on-rate (A) and off-rate (B) constants are dependent on the total bond energy ( $U_{\text{long}}$ ) used to define the longitudinal bond and are calculated from the simulation. Trend line for  $k_{\text{off}}$  is best-fit exponential. (C) The standard Gibbs free energy ( $\Delta G_{\text{long}}^0$ , green), intrinsic bond strength ( $\Delta G_B^0$ , magenta), and entropic penalty of binding ( $\Delta G_S^0$ , blue) are shown as a function of the total bond energy for the longitudinal bond. From the results in panel A and B, and an estimate of the average  $\Delta G_B^0$  within the simulation,  $\Delta G_{\text{long}}^0$  and  $\Delta G_S^0$  can be obtained. The total bond energy that best matched previous estimates of the longitudinal bond free energy ( $\Delta G_{\text{long}}^0$ ) was extracted from the resulting trend line. All trend lines are linear best fit, unless otherwise noted.

plementation of Boltzmann's law while the subunit is bound (see the Supporting Material). Thus, the entropic penalty of binding comes out naturally from the simulation. In the range of values for  $U_{\text{long}}$  used here, our estimate of the

entropic penalty of binding,  $\Delta G^0_s \approx 10 k_B T$ , is comparable to previous estimates based on tubulin polymerization (27), actin fragmentation (30), and experimentally observed filament lengths (39), and is independent of the total bond energy. Thus, all three components of Eq. 6 can be extracted from the simulation for a given parameter set and, using our estimate of  $U_{\text{long}} = -20.4 k_B T$ , are in agreement with previous estimates for tubulin-tubulin interactions.

A summary of complete kinetic and thermodynamic results (estimated using Eqs. 5–7) for varying local conditions is shown in Table 1 (see Table S1 in the Supporting Material for F-actin). Interestingly, the estimated entropic penalty of binding is nearly equal between the zero- and one-neighbor conditions ( $\sim 1 k_B T$  difference, which can mostly be attributed to the approximately twofold steric penalty to the on-rate,  $\ln(2) = 0.7 k_B T$ ). This indicates that once a subunit is bound longitudinally it does not pay an additional entropic penalty by forming the lateral bond (consistent with the assumption in VanBuren et al. (11) that the entropic penalty is absorbed entirely by the longitudinal bond). Thus, lateral bonds have a significant stabilizing effect ( $\sim 60$ -fold to  $>300$ -fold longer subunit lifetime with one and two lateral bonds, respectively) by contributing favorably to the free energy of association (see Movie S3). Although we only set an upper limit for the off-rate for subunits with two lateral bonds (see the Supporting Material), this upper limit is still fivefold lower than with one lateral bond, thus we expect the addition of the second lateral bond to further contribute favorably to the free energy.

The observed stabilizing effect of the lateral bond is dependent upon the longitudinal bond being established first. Lateral bonds, by themselves, are unfavorable because the entropic penalty of binding is greater than the intrinsic bond strength of the lateral bond, resulting in a very short-lived interaction (see Table S2). The exceptionally short duration of lateral bonds in the absence of a longitudinal bond ( $\sim 0.1 \mu\text{s}$ ) explains why they were not able to overcome the steric penalty imposed on association by lateral neighbors (Fig. 4). The reduction in free energy by one lateral bond ( $-3.6 k_B T$ ) is less than previously estimated for the lateral bond (11); however, it would become more negative for decreasing total bond energies ( $U_{\text{lat}}$ ). Therefore, we do not consider this to be an estimate of  $\Delta G^0_{\text{lat}}$ , but rather a value determined by the total interaction

energy used in the simulation, i.e.,  $U_{\text{lat}}$  could be adjusted downward to obtain previously estimated values of  $\Delta G^0_{\text{lat}}$ . Even so, the total bond energy would still be on the order of the entropic penalty. Thus, we conclude that subunits adding to the microtubule lattice require the stronger longitudinal bond to incorporate into the lattice.

The necessity of the longitudinal bond is in qualitative agreement with the suggestion that cracks between protofilaments may be present within the lattice due to a delay in lateral bond formation after a subunit binds (24). However, we argue that quantitatively they would be extremely short-lived, because we find lateral bonds form rapidly after the longitudinal bond ( $7.0 \pm 0.7$  ns for one and  $9.0 \pm 0.8$  ns for two lateral bonds, mean  $\pm$  SE) in our model. The necessity of the longitudinal bond further suggests that additions with either a single or two lateral bonds but no longitudinal bond, resulting in a lattice defect, would be very rare due to their extremely short duration. Thus, the strength difference between the longitudinal and lateral bonds may be an evolutionary advantage to reduce the frequency of lattice defects and resulting structural weakness.

### A model to investigate the actions of microtubule-associated proteins and drugs

To our knowledge, the model described here is the first to bridge the gap between molecular dynamics models (18–22) and dimer-level stochastic microtubule models (9–12,23,24). Thus, the Brownian dynamics modeling approach we employed here provides a method to analyze the effects of microtubule-associated proteins (MAPs) and microtubule-directed drugs for which the relative structure and interaction with the microtubule lattice is known. The simplest cases are interactions that modify one of the parameters included in our model, such as longitudinal or lateral bond energy or bond stiffness. For example, the majority of studies have found that paclitaxel decreases the rigidity of microtubules (40–44), except one that saw the opposite effect (45). Because of its binding position close to the M-loop of the  $\beta$ -monomer, it has been suggested that paclitaxel may function to increase the strength of the lateral bond to overcome nucleotide-based structural changes of the tubulin dimer (26,46). Further, drug binding to the taxane-pocket of  $\beta$ -tubulin structures the M-loop closer to that of the bound state before incorporation into the lattice (47). Structuring of the M-loop implies an increase in stiffness in the presence of paclitaxel, which agrees with molecular dynamics simulations that found the M-loop shows reduced root-mean-squared fluctuations in stable forms of tubulin (18,19). In addition to locally altering the lateral interactions, paclitaxel has long-range allosteric effects on the residues that establish the longitudinal bond interface (T1–T5 and H11 loops) in  $\beta$ -tubulin, increasing the root-mean-squared fluctuations (18).

Though it may not be clear which effect (lateral or longitudinal) of paclitaxel is more important for stabilization, it

**TABLE 1 Summary of simulation results with zero, one, and two lateral bonds in addition to the longitudinal bond**

| Model-estimated parameters                                         | Longitudinal bond only |                       | Longitudinal and lateral bond |                       |
|--------------------------------------------------------------------|------------------------|-----------------------|-------------------------------|-----------------------|
|                                                                    | Lateral neighbors = 0  | Lateral neighbors = 1 | Lateral neighbors = 1         | Lateral neighbors = 2 |
| $k_{\text{on,PF}} (\mu\text{M}^{-1} \text{s}^{-1} \text{PF}^{-1})$ | 12.7                   | 7.4                   | 1.7                           |                       |
| $k_{\text{off}} (\text{s}^{-1})$                                   | $15 \times 10^3$       | 250                   | <50                           |                       |
| $\Delta G^0_B (k_B T)$                                             | -17.7                  | -22.6                 | -28.5                         |                       |
| $\Delta G^0 (k_B T)$                                               | -6.7                   | -10.3                 | <-10.4                        |                       |
| $\Delta G^0_s (k_B T)$                                             | +11.0                  | +12.3                 | <+18.0                        |                       |

can be assumed that paclitaxel modifies the intrinsic rigidity of regions within the tubulin dimer involved in establishing interdimer interactions. Our model predicts that increased bond stiffness decreases the on-rate constant and increases the off-rate, meaning that softer bonds lead to a more favorable interaction (more negative  $\Delta G_{\text{long}}^0$ ; see Fig. S4 and Fig. S5). Despite influencing the on-rate constant, the bond stiffness had no effect on the steric penalties imposed by laterally neighboring protofilaments (see Fig. S6). Interestingly, the intrinsic bond strength estimated from the simulation ( $\Delta G_B^0$ ) is not sensitive to the bond stiffness. Therefore, the change in  $\Delta G_{\text{long}}^0$  is due to the entropic penalty of binding ( $\Delta G_S^0$ ) (see Fig. S4). Because softer bonds do not constrain the translational and rotational freedom to the extent that stiffer bonds do, the entropic penalty of binding is reduced for softer longitudinal bonds.

These results indicate that the stabilizing modifications of paclitaxel are likely through the longitudinal rather than the lateral bond, because structuring of the M-loop itself will be unfavorable due to an increased entropic penalty. To combat this, however, rearrangement of the M-loop favorably positions several additional residues to form lateral contacts with the neighboring  $\beta$ -tubulin (47). These counteracting effects of paclitaxel could potentially explain experimental results suggesting that paclitaxel has no net effect on the lateral interaction between protofilaments when deformed by osmotic stress (48). Our model predicts that softening of the longitudinal bond should increase the association rate constant in the presence of paclitaxel (see Fig. S4 A), and therefore should increase the polymerization rate. While this increase has not been observed experimentally, it may be difficult to detect because paclitaxel increases the amount of tubulin in polymer form at the expense of free tubulin in solution (49,50). A drop in the free concentration would counteract any increase of the association rate constant such that the on-rate ( $k_{\text{on}}^* = k_{\text{on,MT}} [\text{Tub}]$ ) might change only weakly in the presence of paclitaxel.

Our Brownian dynamics simulations emphasize the inefficiency of subunit addition, despite the presence of a favorable interaction potential (17). Of those that reach  $R = 10$  nm, only 0.5% ultimately bind (Fig. 3 A). Additionally, although a high percentage of free subunits get close to binding ( $N = 1$ ), the vast majority ultimately diffuse away from the microtubule lattice before forming a more specific bond and incorporating into the lattice (~80%, Fig. 3 A). By increasing the probability that these nearly-bound units ultimately bind, a MAP or microtubule-targeting drug could significantly affect the rate at which subunits incorporate into the lattice ( $k_{\text{on,PF}}$ ). In fact, it was suggested that XMAP215 functions in this manner to increase the on-rate constant, by stabilizing an intermediate, diffusion-limited collision complex (6). Any molecule that binds at the microtubule end will impose an unfavorable steric penalty, similar to that which we have shown here for one- and two-neighbor protofilaments. Thus, for a MAP to function

as proposed for XMAP215, an additional favorable effect will have to overcome this steric effect. Additionally, the free subunit would have to associate very favorably with the MAP, because a relatively weak bond, such as the interdimer lateral bond, does not affect the on-rate constant (Fig. 4). Incorporating an interaction similar to that described for XMAP215 into our model could give estimates for the minimum bond strength necessary to increase the on-rate. Alternatively, if a MAP strengthens (makes more negative) the intrinsic bond free energy or decreases the longitudinal bond rigidity, according to our model it then would be predicted to increase the on-rate constant (Fig. 6, and see Fig. S4 and Fig. S5).

## CONCLUSIONS

To our knowledge, we have developed the most detailed kinetic and thermodynamic computational model to-date for the association and dissociation of individual tubulin subunits at the microtubule plus-end, and find that it is consistent with both experimental observations and theoretical predictions for tubulin-tubulin interactions. This model demonstrates that the on-rates for individual strands in multistranded polymers are independent of the global position, but that local structure imposes a steric penalty on association. Thus, the microscopic on-rate constant will be an average of the individual nanoscale protofilament on-rate constants and will vary in time as subunits are gained and lost at the dynamic end. These findings are robust with regard to molecular structure and the precise shape of interparticle potential. Therefore, we believe similar effects will arise not only in other linear polymers but in any system where local steric constraints are placed on binding. The simulation results suggest a feedback mechanism that slows subunit net addition as the microtubule tip tapers, which would promote history-dependent catastrophe and the possibility of more efficient search-and-capture by microtubule plus-ends *in vivo* (51). Additionally, the approach that we employ here provides a model with which to theoretically investigate, at a subnanometer length scale and picosecond-to-millisecond timescale, the actions of microtubule-associated proteins and microtubule-targeting drugs on tubulin kinetics and thermodynamics.

## SUPPORTING MATERIAL

Three movies, six figures, two tables, supplemental information and References (52–61), are available at [http://www.biophysj.org/biophysj/supplemental/S0006-3495\(13\)01137-5](http://www.biophysj.org/biophysj/supplemental/S0006-3495(13)01137-5).

The authors thank Dr. David Sept, Dr. Brannon McCullough, and Joseph Powers for helpful discussions. Simulations were carried out in part through use of computing resources at the University of Minnesota Supercomputing Institute.

This work was supported by grant Nos. R01-GM-71522 and R01-GM-76177 to D.J.O.

## REFERENCES

- Oosawa, F., and S. Asakura. 1975. Thermodynamics of the Polymerization of Protein. Academic Press, New York.
- Pollard, T. D. 1986. Rate constants for the reactions of ATP- and ADP-actin with the ends of actin filaments. *J. Cell Biol.* 103:2747–2754.
- Mitchison, T., and M. Kirschner. 1984. Dynamic instability of microtubule growth. *Nature.* 312:237–242.
- Walker, R. A., E. T. O'Brien, ..., E. D. Salmon. 1988. Dynamic instability of individual microtubules analyzed by video light microscopy: rate constants and transition frequencies. *J. Cell Biol.* 107:1437–1448.
- Hyman, A. A., S. Salsler, ..., T. J. Mitchison. 1992. Role of GTP hydrolysis in microtubule dynamics: information from a slowly hydrolyzable analogue, GMPCPP. *Mol. Biol. Cell.* 3:1155–1167.
- Brouhard, G. J., J. H. Stear, ..., A. A. Hyman. 2008. XMAP215 is a processive microtubule polymerase. *Cell.* 132:79–88.
- Hill, T. L. 1986. Effect of fluctuating surface structure and free energy on the growth of linear tubular aggregates. *Biophys. J.* 49:1017–1031.
- Gardner, M. K., B. D. Charlebois, ..., D. J. Odde. 2011. Rapid microtubule self-assembly kinetics. *Cell.* 146:582–592.
- Chen, Y. D., and T. L. Hill. 1985. Monte Carlo study of the GTP cap in a five-start helix model of a microtubule. *Proc. Natl. Acad. Sci. USA.* 82:1131–1135.
- Bayley, P., M. Schilstra, and S. Martin. 1989. A lateral cap model of microtubule dynamic instability. *FEBS Lett.* 259:181–184.
- VanBuren, V., D. J. Odde, and L. Cassimeris. 2002. Estimates of lateral and longitudinal bond energies within the microtubule lattice. *Proc. Natl. Acad. Sci. USA.* 99:6035–6040.
- VanBuren, V., L. Cassimeris, and D. J. Odde. 2005. Mechanochemical model of microtubule structure and self-assembly kinetics. *Biophys. J.* 89:2911–2926.
- Flyvbjerg, H., T. E. Holy, and S. Leibler. 1996. Microtubule dynamics: caps, catastrophes, and coupled hydrolysis. *Phys. Rev. E Stat. Phys. Plasmas Fluids Relat. Interdiscip. Topics.* 54:5538–5560.
- Chrétien, D., S. D. Fuller, and E. Karsenti. 1995. Structure of growing microtubule ends: two-dimensional sheets close into tubes at variable rates. *J. Cell Biol.* 129:1311–1328.
- Demchouk, A. O., M. K. Gardner, and D. J. Odde. 2011. Microtubule tip tracking and tip structures at the nanometer scale using digital fluorescence microscopy. *Cell Mol. Bioeng.* 4:192–204.
- Coombes, C. E., A. Yamamoto, ..., M. K. Gardner. 2013. Evolving tip structures can explain age-dependent microtubule catastrophe. *Curr. Biol.* 23:1342–1348.
- Northrup, S. H., and H. P. Erickson. 1992. Kinetics of protein-protein association explained by Brownian dynamics computer simulation. *Proc. Natl. Acad. Sci. USA.* 89:3338–3342.
- Mitra, A., and D. Sept. 2008. Taxol allosterically alters the dynamics of the tubulin dimer and increases the flexibility of microtubules. *Biophys. J.* 95:3252–3258.
- André, J. R., M.-J. Clément, ..., P. Manivet. 2012. The state of the guanosine nucleotide allosterically affects the interfaces of tubulin in protofilament. *J. Comput. Aided Mol. Des.* 26:397–407.
- Sept, D., N. A. Baker, and J. A. McCammon. 2003. The physical basis of microtubule structure and stability. *Protein Sci.* 12:2257–2261.
- Grafmüller, A., E. G. Noya, and G. A. Voth. 2013. Nucleotide-dependent lateral and longitudinal interactions in microtubules. *J. Mol. Biol.* 425:2232–2246.
- Wells, D. B., and A. Aksimentiev. 2010. Mechanical properties of a complete microtubule revealed through molecular dynamics simulation. *Biophys. J.* 99:629–637.
- Gregoret, I. V., G. Margolin, ..., H. V. Goodson. 2006. Insights into cytoskeletal behavior from computational modeling of dynamic microtubules in a cell-like environment. *J. Cell Sci.* 119:4781–4788.
- Margolin, G., I. V. Gregoret, ..., H. V. Goodson. 2012. The mechanisms of microtubule catastrophe and rescue: implications from analysis of a dimer-scale computational model. *Mol. Biol. Cell.* 23:642–656.
- Metropolis, N., A. W. Rosenbluth, ..., E. Teller. 1953. Equation of state calculations by fast computing machines. *J. Chem. Phys.* 21:1087–1092.
- Nogales, E., M. Whittaker, ..., K. H. Downing. 1999. High-resolution model of the microtubule. *Cell.* 96:79–88.
- Erickson, H. P., and D. Pantaloni. 1981. The role of subunit entropy in cooperative assembly. Nucleation of microtubules and other two-dimensional polymers. *Biophys. J.* 34:293–309.
- de la Cruz, E. M., J. Roland, ..., J.-L. Martiel. 2010. Origin of twist-bend coupling in actin filaments. *Biophys. J.* 99:1852–1860.
- Fujii, T., A. H. Iwane, ..., K. Namba. 2010. Direct visualization of secondary structures of F-actin by electron cryomicroscopy. *Nature.* 467:724–728.
- Erickson, H. P. 1989. Co-operativity in protein-protein association. The structure and stability of the actin filament. *J. Mol. Biol.* 206:465–474.
- Mandelkow, E. M., E. Mandelkow, and R. A. Milligan. 1991. Microtubule dynamics and microtubule caps: a time-resolved cryo-electron microscopy study. *J. Cell Biol.* 114:977–991.
- Odde, D. J., L. Cassimeris, and H. M. Buettner. 1995. Kinetics of microtubule catastrophe assessed by probabilistic analysis. *Biophys. J.* 69:796–802.
- Gardner, M. K., M. Zanic, ..., J. Howard. 2011. Depolymerizing kinesins Kip3 and MCAK shape cellular microtubule architecture by differential control of catastrophe. *Cell.* 147:1092–1103.
- Howell, B., D. J. Odde, and L. Cassimeris. 1997. Kinase and phosphatase inhibitors cause rapid alterations in microtubule dynamic instability in living cells. *Cell Motil. Cytoskeleton.* 38:201–214.
- Seetapun, D., B. T. Castle, ..., D. J. Odde. 2012. Estimating the microtubule GTP cap size in vivo. *Curr. Biol.* 22:1681–1687.
- Brun, L., B. Rupp, ..., F. Nédélec. 2009. A theory of microtubule catastrophes and their regulation. *Proc. Natl. Acad. Sci. USA.* 106:21173–21178.
- Jencks, W. P. 1981. On the attribution and additivity of binding energies. *Proc. Natl. Acad. Sci. USA.* 78:4046–4050.
- Horton, N., and M. Lewis. 1992. Calculation of the free energy of association for protein complexes. *Protein Sci.* 1:169–181.
- Howard, J. 2001. Mechanics of Motor Proteins and the Cytoskeleton. Sinauer Associates, Sunderland, MA.
- Dye, R. B., S. P. Fink, and R. C. Williams, Jr. 1993. Taxol-induced flexibility of microtubules and its reversal by MAP-2 and Tau. *J. Biol. Chem.* 268:6847–6850.
- Felgner, H., R. Frank, and M. Schliwa. 1996. Flexural rigidity of microtubules measured with the use of optical tweezers. *J. Cell Sci.* 109:509–516.
- Kurachi, M., M. Hoshi, and H. Tashiro. 1995. Buckling of a single microtubule by optical trapping forces: direct measurement of microtubule rigidity. *Cell Motil. Cytoskeleton.* 30:221–228.
- Venier, P., A. C. Maggs, ..., D. Pantaloni. 1994. Analysis of microtubule rigidity using hydrodynamic flow and thermal fluctuations. *J. Biol. Chem.* 269:13353–13360.
- Kawaguchi, K., and A. Yamaguchi. 2010. Temperature dependence rigidity of non-taxol stabilized single microtubules. *Biochem. Biophys. Res. Commun.* 402:66–69.
- Mickey, B., and J. Howard. 1995. Rigidity of microtubules is increased by stabilizing agents. *J. Cell Biol.* 130:909–917.
- Li, H., D. J. DeRosier, ..., K. H. Downing. 2002. Microtubule structure at 8 Å resolution. *Structure.* 10:1317–1328.
- Prota, A. E., K. Bargsten, ..., M. O. Steinmetz. 2013. Molecular mechanism of action of microtubule-stabilizing anticancer agents. *Science.* 339:587–590.
- Needleman, D. J., M. A. Ojeda-Lopez, ..., C. R. Safinya. 2005. Radial compression of microtubules and the mechanism of action of taxol and associated proteins. *Biophys. J.* 89:3410–3423.

49. Derry, W. B., L. Wilson, and M. A. Jordan. 1995. Substoichiometric binding of taxol suppresses microtubule dynamics. *Biochemistry*. 34:2203–2211.
50. Jordan, M. A., R. J. Toso, ..., L. Wilson. 1993. Mechanism of mitotic block and inhibition of cell proliferation by taxol at low concentrations. *Proc. Natl. Acad. Sci. USA*. 90:9552–9556.
51. Odde, D. J., and H. M. Buettner. 1998. Autocorrelation function and power spectrum of two-state random processes used in neurite guidance. *Biophys. J.* 75:1189–1196.
52. Doi, M., and S. F. Edwards. 1986. *The Theory of Polymer Dynamics*. Oxford University Press, New York.
53. Fernandes, M. X., and J. G. de la Torre. 2002. Brownian dynamics simulation of rigid particles of arbitrary shape in external fields. *Biophys. J.* 83:3039–3048.
54. Kikuchi, K., M. Yoshida, ..., H. Watanabe. 1991. Metropolis Monte Carlo method as a numerical technique to solve the Fokker-Planck equation. *Chem. Phys. Lett.* 185:335–338.
55. Tiana, G., L. Sutto, and R. A. Broglia. 2007. Use of the Metropolis algorithm to simulate the dynamics of protein chains. *Phys. A Stat. Mech. Appl.* 380:241–249.
56. Andrews, S. S., and D. Bray. 2004. Stochastic simulation of chemical reactions with spatial resolution and single molecule detail. *Phys. Biol.* 1:137–151.
57. Uhlenbeck, G., and L. Ornstein. 1930. On the theory of the Brownian motion. *Phys. Rev.* 36:823–841.
58. Ermak, D., and J. McCammon. 1978. Brownian dynamics with hydrodynamic interactions. *J. Chem. Phys.* 69:1352–1360.
59. Brenner, H. 1961. The slow motion of a sphere through a viscous fluid towards a plane surface. *Chem. Eng. Sci.* 16:242–251.
60. Wolynes, P. G., and J. A. McCammon. 1977. Hydrodynamic effect on the coagulation of porous biopolymers. *Macromolecules*. 10:86–87.
61. Wolynes, P. G. 1976. Slip boundary conditions and the hydrodynamic effect on diffusion controlled reactions. *J. Chem. Phys.* 65:450–454.

## **Supporting Material**

### **Brownian dynamics of subunit addition-loss kinetics and thermodynamics in linear polymer self-assembly**

Brian T. Castle and David J. Odde

Department of Biomedical Engineering, University of Minnesota, Minneapolis, MN 55455

## **CONTENTS**

---

|                                                                                           |           |
|-------------------------------------------------------------------------------------------|-----------|
| <b>Supporting Methods .....</b>                                                           | <b>2</b>  |
| Simulation procedure .....                                                                | 2         |
| Estimating on-rate constants .....                                                        | 3         |
| Defining a distance criterion for unbinding events.....                                   | 4         |
| Simulation of microtubule net assembly.....                                               | 4         |
| <b>Supporting Results and Discussion .....</b>                                            | <b>5</b>  |
| Comparing the modified Metropolis Monte Carlo to previous methods.....                    | 5         |
| Influence of hydrodynamic interactions on stereospecific binding in linear polymers ..... | 7         |
| Establishing upper and lower bounds for the total longitudinal bond energy .....          | 8         |
| Sensitivity of model predictions to the interaction potential .....                       | 8         |
| <b>Supporting References: .....</b>                                                       | <b>10</b> |
| <b>Supporting Movie Descriptions .....</b>                                                | <b>11</b> |
| <b>Figure S1 .....</b>                                                                    | <b>12</b> |
| <b>Figure S2 .....</b>                                                                    | <b>13</b> |
| <b>Figure S3 .....</b>                                                                    | <b>14</b> |
| <b>Figure S4 .....</b>                                                                    | <b>15</b> |
| <b>Figure S5 .....</b>                                                                    | <b>16</b> |
| <b>Figure S6 .....</b>                                                                    | <b>17</b> |
| <b>Supporting Tables.....</b>                                                             | <b>18</b> |

---

## Supporting Methods

### Simulation procedure

For all simulations we implemented the following procedure:

1. Initialize microtubule structure, as well as the starting position and orientation of the freely diffusing unit.
2. Translate and rotate the free unit.
3. Implement Metropolis Monte Carlo criterion based on the current and projected energetic states.
4. Check ending criteria for the given simulation (binding state or separation). If satisfied, continue to step 5 otherwise return to step 2.
5. Calculate the rate.

At each time step, subunits experienced a translational-rotational displacement described by

$$\mathbf{v} = (\Delta x_1', \Delta x_2', \Delta x_3', \phi_1, \phi_2, \phi_3), \quad (S1)$$

where  $\Delta x_1'$ ,  $\Delta x_2'$ , and  $\Delta x_3'$  are translational displacements of the centroid position in the subunit body frame and  $\phi_1$ ,  $\phi_2$ , and  $\phi_3$  are rotations of the body frame axes about the lab frame axes.

Each translational displacement was sampled from a Gaussian distribution that obeys

$$\langle (\Delta x_k')^2 \rangle = 2D\Delta t \quad (S2)$$

where  $D$  is the translational diffusion coefficient parallel ( $D_{\parallel}$ , for  $k=1$ ) or perpendicular ( $D_{\perp}$ , for  $k=2,3$ ) to the long axis of an ellipsoid (1) and  $\Delta t$  is the current time step. Similar distributions were used to generate rotational displacements with  $D$  replaced by the respective rotational diffusion coefficient for axial ( $D_a$ , for  $k=1$ ) or non-axial rotation ( $D_r$ , for  $k=2,3$ ). Centroid displacements in the body frame were translated to the lab frame as described by (2). At each time point

$$\begin{bmatrix} \Delta x_1 \\ \Delta x_2 \\ \Delta x_3 \end{bmatrix} = \mathbf{M}(t_j) \cdot \begin{bmatrix} \Delta x_1' \\ \Delta x_2' \\ \Delta x_3' \end{bmatrix}, \quad (S3)$$

where  $\mathbf{M}(t_j)$  is a three-dimensional rotation matrix that defines the rotation of the body frame axes about each individual axis of the lab frame at the current time step. The matrix  $\mathbf{M}(t_j)$  is updated after each accepted step using the random rotational displacements according to

$$\mathbf{M}(t_{j+1}) = \mathbf{M}(t_j) \cdot \mathbf{R}(\phi_1, \phi_2, \phi_3) = \mathbf{M}(t_j) \cdot \mathbf{R}_3 \cdot \mathbf{R}_2 \cdot \mathbf{R}_1, \quad (S4)$$

where  $\mathbf{R}_1$ ,  $\mathbf{R}_2$ , and  $\mathbf{R}_3$  are the respective rotation matrices about each lab frame axis, for example

$$\mathbf{R}_1 = \begin{bmatrix} 1 & 0 & 0 \\ 0 & \cos(\phi_1) & -\sin(\phi_1) \\ 0 & \sin(\phi_1) & \cos(\phi_1) \end{bmatrix}. \quad (S5)$$

To minimize the number of steps when a free unit was not near the microtubule lattice, we used a variable time step that was based on the separation distance between paired binding zones. At each time point, the time step was calculated from

$$\Delta t = \frac{1}{6D_{\parallel}} \left( \frac{d}{\lambda} \right)^2, \quad (\text{S6})$$

such that the root-mean-squared displacement for a given time step was less than the distance between interacting zones. In Eq. S6 above,  $d$  is defined as the minimum separation distance between corresponding interaction zones ( $d = \min[r_1(t_j), r_2(t_j), r_3(t_j)]$ ) unless  $d < r_B$ , then  $d = r_B$ , such that the  $\min(\Delta t) > 1$  ps. We used the diffusion coefficient along the long axis of the super-ellipsoid ( $D_{\parallel}$ ) in Eq. S6, as this was the larger of the two translational diffusion coefficients in the body frame. An adjustable constant,  $\lambda$ , is used to scale the size and number of steps taken during the simulation. When subunits were far away from the lattice ( $> 100$  nm)  $\lambda = 5$ , otherwise  $\lambda = 10$  for all simulations. Using these values of  $\lambda$  ensured that energy changes of bound zones were relatively small (average  $|\Delta U| < 1.0 k_B T$ ) while still minimizing simulation time.

Before advancing to the next time point, attempted steps were either allowed or disallowed through implementation of Metropolis Monte Carlo (3), where  $P_{\text{step}} = \min[1, \exp(-\Delta U/k_B T)]$ . Here favorable steps ( $\Delta U \leq 0$ ) are always allowed and unfavorable steps ( $\Delta U > 0$ ) are accepted according to Boltzmann's law. When a freely diffusing subunit spatially overlaps the microtubule lattice, we assumed that  $\Delta U = \infty$  (such that  $P_{\text{step}} = 0$ ) to implement hard sphere rejection criteria. In the case of a rejected step, time is advanced by  $\Delta t$  but the position and orientation of the diffusing unit does not change from the previous time point. While the implementation of a variable time step and sampling moves from a Gaussian random variable were modifications to previous versions of the Metropolis algorithm for protein dynamics (4, 5), we found that this algorithm converged to theoretical expectation both in the presence and absence of an external force (Fig. S1; see also Supporting Results and Discussion) while enabling faster simulation.

### *Estimating on-rate constants*

To isolate potential effects on both diffusion-limited arrivals to the microtubule lattice and binding, we split simulations into two parts, far- and near-field. Rates for each simulation scale were calculated according to (6) as

$$k = \frac{k_D(R_{\text{start}})\beta}{1 - (1 - \beta)k_D(R_{\text{start}})/k_D(R_{\text{end}})}, \quad (\text{S7})$$

where  $k_D(R)$  is the diffusion-limited rate of arrival to a center-to-center distance of  $R$  defined by

$$k_D(R) = 4\pi D_{\text{avg}} R \quad (\text{S8})$$

Here,  $D_{\text{avg}}$  is the average diffusion coefficient in three body axes of the ellipsoid from

$$D_{\text{avg}} = (2D_{\perp} + D_{\parallel})/3 \quad (\text{S9})$$

In far-field simulations (diffusion-limited arrivals), freely diffusing subunits are initiated by placement on a spherical surface of radius  $R_{\text{start}} = 400$  nm and with a random orientation. Subunits are allowed to diffuse until reaching either  $R_{\text{end}} = 3200$  nm (i.e. they diffused far away from the binding site and were highly unlikely to bind) or a center-to-center distance of 10 nm from the subunit of interest within the microtubule lattice (i.e. they diffused close to the binding site and were potentially capable of binding). Here,  $\beta$  in Eq. S7 is the fraction of diffusing units that reach 10 nm center-to-center before reaching  $R_{\text{end}}$ . Therefore,  $k$  is the diffusion-limited arrival rate to a center-to-center distance of 10 nm ( $k_D(R = 10 \text{ nm})$ ). The centroid positions of units that reach 10 nm are subsequently used as the starting positions to initiate the corresponding near-field simulations. In the near-field simulations  $R_{\text{end}} = 400$  nm (value of  $R_{\text{start}}$



for far-field) and  $k_D(R_{\text{start}})$  in Eq. S7 is replaced by the estimated value of  $k_D(R = 10 \text{ nm})$  from the corresponding far-field simulations. For near-field simulations,  $\beta$  is the fraction of subunits that completely bind, or meet the criteria that all individual zones (either longitudinal, lateral, or both) are within the binding radius ( $r_i \leq r_B$  for all values of  $i$ ). Eq. S7 then gives the estimated association rate constant ( $k_{\text{on,PF}}$ ) for binding to the protofilament of interest. For each binding site condition, we ran a total of 500,000 far-field and 200,000 near-field simulations, which required about 50 CPU hours/processor.

### *Defining a distance criterion for unbinding events*

Defining when a subunit is unbound is not as straightforward as defining when it is bound. As seen in Fig. S3A, freely diffusing subunits break all zone contacts ( $N = 0$ ,  $r_i > r_B$  for all  $i$ ) multiple times before finally diffusing away from the microtubule lattice. This is because when a free unit first breaks all contacts, it is still highly correlated with its bound orientation, making the probability of rebinding very high. It is difficult to reason that this is a true unbinding event because the majority will immediately rebind (Fig. S3). Thus, to more appropriately define an unbinding event we used a separation distance criterion, similar to (7), where the unbinding radius ( $R_U$ ) is greater than the binding radius ( $r_B$ ) (Note: we can not directly compare  $r_B$  and  $R_U$ , as  $r_B$  is an edge-to-edge distance and  $R_U$  is center-to-center). To determine this distance, we simulated completely bound subunits until they reached varying center-to-center separation distances ( $R$ ) from their binding partner. The resulting centroid positions and subunit orientations were then used to initiate subsequent binding simulations to estimate the probability of rebinding. We define  $R_U$  as the distance where a free unit has a low probability ( $p < 0.01$ ) of rebinding before diffusing away,  $R_U = 11 \text{ nm}$  center-to-center in this case (Fig. S3B). Using our distance criterion for unbinding, the distribution of unbinding times fits well with the expected single exponential ( $p = 0.82$ , Kolmogorov-Smirnov test) for a first-order rate (Fig. S3C). Therefore, we reason that this distance criterion is a reasonable way to practically define when a freely diffusing subunit is unbound within the simulation.

We did not simulate complete unbinding events in the very stable condition where a subunit has a longitudinal bond and two lateral bonds, due to the expected duration of the interaction (from (8),  $k_{\text{off}} = 0.05 \text{ s}^{-1}$  for  $k_{\text{on,PF}} = 4 \mu\text{M}^{-1} \text{ s}^{-1}$ ). Alternatively, we set a limit for the unbinding time,  $\tau$ , and looked at the number of successful unbinding events in that amount of time. The number of successes will obey a binomial distribution, with probability of success  $p = k/n$  where  $k$  is the number of successes and  $n$  is the total number of simulations. Since the unbinding time is exponentially distributed (Fig. S3C), the probability that an event occurs in  $T \leq \tau$  is  $p = 1 - e^{-\lambda\tau}$ . From this we obtain  $k/n = 1 - e^{-\lambda\tau}$  and thus can estimate the rate,  $\lambda$ , from the number of successes and the cut-off time. Setting a limit of  $\tau = 1 \text{ ms}$ , we found that zero subunits successfully unbound for conditions with one longitudinal and two lateral bonds for both tubulin and actin. Therefore we set an upper limit on the off-rate by finding the maximum value of  $\lambda$ , such that the probability of observing zero success in  $n$  trials for the binomial  $B(n, p = 1 - e^{-\lambda\tau})$  was greater than 0.05.

### *Simulation of microtubule net assembly*

Net assembly of individual microtubules was simulated according to (8) at  $6.5 \mu\text{M}$  free tubulin concentration for three penalty conditions: without penalties, two-neighbor penalty only (9), and model estimated penalties for one and two lateral neighbors. Simulations in each

condition were run for a total of 60 s of real-time and the resulting tip structures from the last 30s were examined at 1s intervals. A total of 16 runs were performed, resulting in 496 structures per condition. The zero-neighbor on-rate constant ( $k_{\text{on,PF}}$ ) was scaled in simulations with penalties such that the average microtubule on-rate constant ( $k_{\text{on,MT}}$ ) was equal for all simulations. Additionally, we increased the strength of the longitudinal bond in simulations with penalties (more negative  $\Delta G^0_{\text{long}}$ ;  $-0.4 k_B T$  or  $-1.0 k_B T$  for simulations with only two-neighbor and with both penalties, respectively) such that the net assembly rate was equal in each condition. Resulting structures from each simulation condition were ordered by the standard deviation of protofilament lengths, then the lower and upper 10% were considered to be blunt and tapered for that condition, respectively. This parsing of the tip structures was performed for each condition individually in order to compare the fraction of protofilaments with zero, one, or two lateral neighbors in the blunt and tapered tips across simulation conditions.

## **Supporting Results and Discussion**

### *Comparing the modified Metropolis Monte Carlo to previous methods*

In the presence of an external force, our simulation approach is based on the Metropolis Monte Carlo (3) (MMC) method for protein dynamics. The MMC method is a solution for the diffusive Fokker-Plank equation

$$\frac{\partial p(x,t)}{\partial t} = D \frac{\partial^2 p(x,t)}{\partial x^2} - \frac{1}{\gamma} \frac{\partial}{\partial x} [F(x)p(x,t)] \quad (\text{S10})$$

when molecule steps are sampled from a uniform distribution  $[-r,r]$ , where  $r$  is small and held constant throughout the simulation (4, 5). We implemented the following two modifications, which serve to improve algorithm efficiency without a substantial cost in accuracy (documented below): 1) steps were sampled from a Gaussian distribution instead of a uniform distribution, and 2), the time step varies throughout the simulation such that time steps are larger when the diffusing tubulin subunit is far from the binding site on the microtubule. Since our algorithm has been modified from the original MMC, we simulated a number of asymptotic cases that have analytical solutions to Eq. S10 to confirm that our modified MMC yields the correct solutions (4, 5).

Assuming a delta function initial condition  $p(x,t=0) = \delta(x-x_0)$  at  $x_0 = 0$ , solutions to Eq. S10 are well defined in both the presence and absence of an external force, and in each case converge to a Gaussian distribution

$$p(x,t) = \frac{1}{\sqrt{2\pi\sigma^2}} \exp\left[-\frac{(x-\mu)^2}{2\sigma^2}\right]. \quad (\text{S11})$$

In the absence of force,  $\mu = 0$  and  $\sigma^2 = 2Dt$ , where  $D$  is the diffusion coefficient. In the presence of a constant external force,  $F$ , the force causes the molecule to move with constant velocity  $v = F/\gamma$ , where  $\gamma$  is the drag coefficient. This drift velocity is superimposed on the diffusive motion such that only the mean is affected and is given by  $\mu = vt = (F/\gamma)t$ . To test whether our simulation obeyed Eq. S10, we used our modified MMC to simulate molecular diffusion in one dimension with  $D = D_{\text{avg}}$  (from Eq. S9) in the absence and presence of a constant external force  $F = 2$  pN (Figure S1A and B). As shown in Fig. S1A and B, our simulation results fit well with theoretical expectation (from Eq. S11) at multiple time scales and were comparable to those using previous MMC methods.

Since we assume the interaction potential between binding partners is harmonic, we further sought to examine whether our modified MMC algorithm agreed with expectation for diffusion in a harmonic potential,  $U(x) = \frac{1}{2}kx^2$  where  $k$  is the spring constant. Assuming a delta function initial condition, as above, molecular motion obeys an Ornstein-Uhlenbeck process (10), in which the analytical solution to Eq. S10 is

$$p(x, t) = \left( \frac{k}{2\pi k_B T (1 - \exp[-(2k/\gamma)t])} \right)^{1/2} \exp \left[ - \left( \frac{k}{2k_B T} \right) \frac{(x - x_0 \exp[-(k/\gamma)t])^2}{(1 - \exp[-(2k/\gamma)t])} \right]. \quad (\text{S12})$$

As shown in Fig. S1B and C our modified MMC algorithm agrees with Eq. S12 in both cases where  $x_0 = 0$  and  $x_0 = 0.2$  nm using  $k = k_{\text{long},i}$ . Comparing Eq. S12 to Eq. S11 we can see that in a harmonic potential the resulting distribution is also Gaussian, where the mean and variance are both a function of time

$$\mu(t) = x_0 \exp[-(k/\gamma)t] \quad (\text{S13})$$

$$\sigma^2(t) = \left( \frac{k_B T}{k} \right) (1 - \exp[-(2k/\gamma)t]) \quad (\text{S14})$$

As  $t \rightarrow \infty$ , Eq. S12 is equivalent to Boltzmann's law ( $p \sim e^{-U/k_B T}$ ) for a harmonic with  $U(x) = \frac{1}{2}kx^2$

$$p(x, t \rightarrow \infty) = \left( \frac{k}{2\pi k_B T} \right)^{1/2} \exp \left[ - \left( \frac{k}{2k_B T} \right) x^2 \right]. \quad (\text{S15})$$

At steady-state,  $\mu(t \rightarrow \infty) = 0$  and  $\sigma^2(t \rightarrow \infty) = k_B T / k$ , which is consistent with equipartition of energy. The mean and variance of particle position converge to steady-state with time constant  $\tau = \gamma/k$  and  $\tau = \gamma/(2k)$  for the mean and variance, respectively. By estimating the mean and variance of molecule positions as a function of time for the case where  $x_0 = 0.2$  nm, we found that our modified MMC algorithm approached steady-state on the correct time scale (Fig. S1D and E). As our algorithm agrees with theoretical expectation in various conditions of diffusion in the absence and presence of force and in steady-state and in unsteady-state, we conclude that it is a good approximation to the equations of diffusive motion.

While our results do not differ from previous methods, our modified MMC approach has several advantages over the previous methods. First, in sampling from a uniform distribution, multiple moves are required before the distribution converges to a Gaussian (via the central limit theorem), compared to our approach where moves for every time step are Gaussian distributed. Therefore, at short time scales (i.e. after few steps) our modified MMC should more accurately predict the expected molecule distribution. Other Brownian dynamics methods have sampled moves from a Gaussian, but assume that the force is constant for each step and therefore is implemented as a drift term (11). Under the simulation conditions used here, we found that results using this method did not differ from our modified MMC (< 5% difference). The assumption that force is constant, however, would break down for steep interaction potentials (i.e. stiff bonds), possibly resulting in quicker transitions to steady-state (Eq. S13 and S14) or quicker escape time from the potential well (unbinding). Additionally, when simulating few diffusing molecules of interest, our algorithm allows the mean squared step size to be scaled to the relative separation between molecules (Eq. S6), so that computational time is not wasted taking small steps ( $[-r, r]$ ) while molecules are far away from their binding partner.

*Influence of hydrodynamic interactions on stereospecific binding in linear polymers*

As two Brownian particles approach each other or as a particle approaches a wall, the solvent between them must be forced out, resulting in an increased drag force upon approach (12). In the absence of inter-particle interaction potential, these hydrodynamic interactions reduce the diffusion-limited rate of encounters by  $\sim 30\%$  (13, 14). In the presence of an interaction potential, hydrodynamic interactions induce correlation between the movements of nearby molecules, increasing the translational diffusion coefficient while reducing rotational diffusion (11). Thus, it seems that it might be important to include these interactions in any kinetic simulation. In the model described here, freely diffusing subunits bind to sites at the end of the microtubule lattice, which can be thought of as immobile compared to the freely diffusing subunit. Hydrodynamic interactions between the free subunit and the lattice, therefore, will be similar to a particle approaching a wall as described by (12). In this case, hydrodynamic interactions result in a distance dependent effect on the fluid viscosity,  $\eta$ . Therefore, we sought to examine the expected effects of fluid viscosity on the resulting kinetic rate constants.

When considering stereospecific-binding interactions, one must consider both the rate at which molecules collide as well as whether they are properly aligned upon collision. If not initially aligned properly, binding partners can explore additional configurations through rotational diffusion during a single encounter, thereby promoting binding (6). Thus, the efficiency of binding will be dependent on the duration of the encounter and the extent of rotational diffusion during a single encounter

$$\phi = \frac{\langle \Delta\theta^2 \rangle^{1/2}}{2\pi} = \frac{(2D_r\tau_E)^{1/2}}{2\pi} \quad (\text{S16})$$

$$\tau_E = \frac{\delta^2}{6D_t} \quad (\text{S17})$$

where  $\phi$  is the binding efficiency,  $\delta$  is the encounter distance, and  $D_r$  and  $D_t$  are the rotational and translational diffusion coefficients, respectively. Using our model parameters in Eqs. S16-S17, assuming  $D_t = D_{\text{avg}}$  and  $\delta = 2r_B$ , we estimate  $\phi = 0.025$ , which is nearly identical to that resulting for  $N = 1$  (purely diffusive motion) in our simulation (Fig. 3A). Predicting how the binding efficiency will scale with viscosity,  $\eta$ , we see

$$\phi = \frac{(2D_r\tau_E)^{1/2}}{2\pi} \propto \left(\frac{D_r}{D_t}\right)^{1/2} \propto \left(\frac{1/\eta}{1/\eta}\right)^{1/2} \quad (\text{S18})$$

Increased viscosity results in a longer encounter but also slows rotational diffusion, and therefore the binding efficiency does not depend upon the viscosity. Assuming the association rate constant is the diffusion-limited collision rate (Smoluchowski rate from Eq. S8) scaled by the binding efficiency

$$k_{\text{on}} = \phi k_D \propto (\text{const.}) \frac{1}{\eta} \quad (\text{S19})$$

Thus, the net-effect of hydrodynamic interactions on the rate constant will be equivalent to reduction in diffusion-limited collisions due to distance dependent changes in the viscosity. As noted above, this is predicted to be  $\sim 30\%$  reduction for two-spheres (13, 14). Therefore, we predict that incorporating hydrodynamic interactions will reduce the estimated values for the on-rate constant, however, will not influence the binding efficiency of individual subunits. As the

effects of global and local structures at the end of the microtubule are due to the binding efficiency (Fig. 3 and 4) and not due to the translational diffusional approach to a position close to the binding site (i.e. 10 nm in the present study), we have ignored explicit inclusion of hydrodynamic interactions in the results presented here. Instead, the simulation results can be corrected by ~30% to provide more accurate estimates of association rate constants.

### *Establishing upper and lower bounds for the total longitudinal bond energy*

Due to the way that we have modeled bond zone interactions, negative displacements away from the potential minimum ( $x = 0$ ), which result in overlap of super-ellipsoid surfaces, are not allowed. Therefore, we can think of each bound zone as a thermally driven spring where only positive displacements are allowed. The intrinsic bond energy will be related to the total longitudinal bond energy (potential energy well-depth) by

$$U_{\text{long}} = \Delta G_{\text{B}}^0 - 3U_i(\mu) \quad (\text{S20})$$

where  $U_i(\mu)$  is the individual spring potential at the mean position,  $\mu$ , and  $\Delta G_{\text{B}}^0$  is the intrinsic bond strength of the longitudinal bond. If we consider the standard free energy of the longitudinal bond,  $\Delta G_{\text{long}}^0$ , as the difference between the favorable  $\Delta G_{\text{B}}^0$  and unfavorable entropic penalty of binding,  $\Delta G_{\text{S}}^0$ , then we can substitute for  $\Delta G_{\text{B}}^0$  in Eq. S20 to get

$$U_{\text{long}} = \Delta G_{\text{long}}^0 - \Delta G_{\text{S}}^0 - 3U_i(\mu) \quad (\text{S21})$$

The mean position of the constrained, thermally driven spring is

$$\mu = \int_0^{\infty} x \cdot f(x) \cdot dx = \frac{2}{\sqrt{2\pi\sigma^2}} \int_0^{\infty} x \cdot e^{-x^2/2\sigma^2} dx, \quad (\text{S22})$$

where the factor of two in the numerator is used to scale the area under the curve to unity. Integration of Eq. S22 results in a mean position of

$$\mu = \frac{2\sigma}{\sqrt{2\pi}} \quad (\text{S23})$$

If we assume that spring displacements have three degrees of freedom, then from equipartition of energy we get  $\sigma^2 = 3k_{\text{B}}T/k_{\text{long},i}$ . Inserting this into Eq. S23, results in a mean position of

$$\mu = \left( \frac{6k_{\text{B}}T}{\pi k_{\text{long},i}} \right)^{1/2} \quad (\text{S24})$$

and the energy at this position is

$$U_i(\mu) = \frac{1}{2} k_{\text{long},i} \left( \frac{6k_{\text{B}}T}{\pi k_{\text{long},i}} \right) = \frac{3k_{\text{B}}T}{\pi}. \quad (\text{S25})$$

Therefore, we assume an unfavorable contribution to  $U_{\text{bond}}$  of  $\sim 1 k_{\text{B}}T$  per interaction zone. Estimates of  $\Delta G_{\text{S}}^0$  range from about 10-12  $k_{\text{B}}T$  (15–17), therefore using  $\Delta G_{\text{long}}^0 = -6.8 k_{\text{B}}T$  from (8) we predict that  $U_{\text{long}} = -21.8$ - $19.8 k_{\text{B}}T$ . As shown in Fig. 6C, we find that  $U_{\text{long}} = -20.4 k_{\text{B}}T$  results in  $\Delta G_{\text{long}}^0 = -6.8 k_{\text{B}}T$ .

### *Sensitivity of model predictions to the interaction potential*

To explore whether or not our results were specific to the specific shape of the harmonic potential of interaction, we simulated subunit binding and unbinding using a Lennard-Jones (LJ) interaction potential where the interaction energy for an individual zone was given by

$$U_i(t_j) = -U_{\text{long},i} \left[ \left( \frac{r_m}{r_m + r_i(t_j)} \right)^{12} - 2 \left( \frac{r_m}{r_m + r_i(t_j)} \right)^6 \right] \text{ for } r_i(t_j) > 0 \quad (\text{S26})$$

Here  $r_m$  is the distance at which  $U_i = U_{\text{long},i}$  and  $r_m = 2^{1/6} \sigma$ , where  $\sigma$  is a shape parameter that defines the slope of the function for a given value of  $U_{\text{long},i}$ , similar to the harmonic spring constant. We added  $r_m$  to the denominator since  $r_i$  is the distance between two points on the surface of the subunits. This ensured that  $U_i = U_{\text{long},i}$  when  $r_i = 0$ . The repulsive portion of the LJ potential for  $r_i < r_m$  was maintained by hard-sphere rejection. For simulations using a LJ potential, we defined  $r_B$  as the point where the slope, or equivalently the inter-particle force, was at its maximum value.

As shown in Fig. S5, the predicted kinetic and thermodynamic trends for LJ are similar to those predicted using a harmonic potential (Fig. 6 and S4). Stronger bonds (more negative  $U_{\text{long}}$ ) resulted in higher  $k_{\text{on,PF}}$ , lower  $k_{\text{off}}$ , and thus a more favorable interaction (more negative  $\Delta G_{\text{long}}^0$ ). The same trend was observed for softer bonds (more positive shape parameter,  $\sigma$ ). Unlike the harmonic potential, we found the estimated entropic penalty of binding ( $\Delta G_s^0$ ) was sensitive to the total bond energy of the LJ. This is because for constant  $\sigma$ , the slope of the LJ potential becomes steeper for more negative values of  $U_{\text{long}}$ . In contrast, the slope of the harmonic potential is only sensitive to the bond stiffness,  $k_{\text{long}}$ . Thus, more negative values of  $U_{\text{long}}$  in the LJ potential also effectively stiffen the bond. When considering this, the trend in  $\Delta G_s^0$  with regards to bond stiffness is equivalent to that observed for a harmonic potential. In the absence of lateral neighbors, we found that using  $U_{\text{long}} = -30 k_B T$  and  $\sigma = 0.6$  nm resulted in  $\Delta G_{\text{long}}^0 \approx -6.8 k_B T$ , and therefore used these values in all subsequent simulations. As shown in Fig. S6, the estimated on-rate constant was slightly lower using a LJ potential for each local condition, however, the steric penalties imposed by local structure were the same as estimated for a harmonic.

In addition to the shape of the potential, it is possible that the parameters used to define the harmonic potential may reduce the steric penalty imposed by laterally adjacent protofilaments. In particular, increasing the bond stiffness would increase the inter-particle force and may help to align subunits in the one and two neighbor case. Alternatively, softer bonds may be able to interact for a longer period of time, while the subunit aligns with the neighboring protofilaments. Therefore, we estimated the penalties for varying longitudinal bond stiffness. While the bond stiffness affected both the estimated on-rate constant and the off-rate constant (Fig. S4), there was no significant effect on the penalties imposed by either one or two lateral neighbors (Fig. S6C and D). These results indicate that the absolute value of the model estimated values depend upon the shape of the chosen potential as well as the parameters that describe it, however, the kinetic rate penalties as well as the kinetic and thermodynamic trends are robust and relatively insensitive to the particular mathematical form of the attractive potential.

**Supporting References:**

1. Doi, M., and S.F. Edwards. 1986. *The Theory of Polymer Dynamics*. New York: Oxford University Press.
2. Fernandes, M.X., and J.G. de la Torre. 2002. Brownian dynamics simulation of rigid particles of arbitrary shape in external fields. *Biophysical Journal*. 83: 3039–48.
3. Metropolis, N., A.W. Rosenbluth, M.N. Rosenbluth, A.H. Teller, and E. Teller. 1953. Equation of State Calculations by Fast Computing Machines. *The Journal of Chemical Physics*. 21: 1087.
4. Kikuchi, K., M. Yoshida, T. Maekawa, and H. Watanabe. 1991. Metropolis Monte Carlo method as a numerical technique to solve the Fokker—Planck equation. *Chemical Physics Letters*. 185: 335–338.
5. Tiana, G., L. Sutto, and R.A. Broglia. 2007. Use of the Metropolis algorithm to simulate the dynamics of protein chains. *Physica A: Statistical Mechanics and its Applications*. 380: 241–249.
6. Northrup, S.H., and H.P. Erickson. 1992. Kinetics of protein-protein association explained by Brownian dynamics computer simulation. *Proceedings of the National Academy of Sciences of the United States of America*. 89: 3338–42.
7. Andrews, S.S., and D. Bray. 2004. Stochastic simulation of chemical reactions with spatial resolution and single molecule detail. *Physical Biology*. 1: 137–51.
8. VanBuren, V., D.J. Odde, and L. Cassimeris. 2002. Estimates of lateral and longitudinal bond energies within the microtubule lattice. *Proceedings of the National Academy of Sciences of the United States of America*. 99: 6035–40.
9. Gardner, M.K., B.D. Charlebois, I.M. Jánosi, J. Howard, A.J. Hunt, et al. 2011. Rapid microtubule self-assembly kinetics. *Cell*. 146: 582–92.
10. Uhlenbeck, G., and L. Ornstein. 1930. On the Theory of the Brownian Motion. *Physical Review*. 36: 823–841.
11. Ermak, D., and J. McCammon. 1978. Brownian dynamics with hydrodynamic interactions. *The Journal of Chemical Physics*. 69: 1352.
12. Brenner, H. 1961. The slow motion of a sphere through a viscous fluid towards a plane surface. *Chemical Engineering Science*. 16: 242–251.
13. Wolynes, P.G., and J.A. McCammon. 1977. Hydrodynamic Effect on the Coagulation of Porous Biopolymers. *Macromolecules*. 10: 86–87.

14. Wolynes, P.G. 1976. Slip boundary conditions and the hydrodynamic effect on diffusion controlled reactions. *The Journal of Chemical Physics*. 65: 450.
15. Erickson, H.P., and D. Pantaloni. 1981. The role of subunit entropy in cooperative assembly. Nucleation of microtubules and other two-dimensional polymers. *Biophysical Journal*. 34: 293–309.
16. Erickson, H.P. 1989. Co-operativity in protein-protein association. The structure and stability of the actin filament. *Journal of Molecular Biology*. 206: 465–74.
17. Horton, N., and M. Lewis. 1992. Calculation of the free energy of association for protein complexes. *Protein Science*. 1: 169–81.

### **Supporting Movie Descriptions**

**Movie S1. Subunit binding with zero neighboring protofilaments.** Individual runs of subunits that reach  $R = 10$  nm separation distance are shown. Percentages indicate the percent of subunits reaching  $R = 10$  nm that either diffuse away from the lattice (left) or eventually bind (right).

**Movie S2. Subunit binding with two neighboring protofilaments.** Individual runs of subunits that reach  $R = 10$  nm separation distance are shown. Percentages indicate the percent of subunits reaching  $R = 10$  nm that either diffuse away from the lattice (left) or eventually bind (right).

**Movie S3. Bound subunit lifetimes.** Bound subunits with zero (left) and one (right) lateral bond are shown. Movie continues until the first subunit leaves the microtubule lattice.



**Figure S1**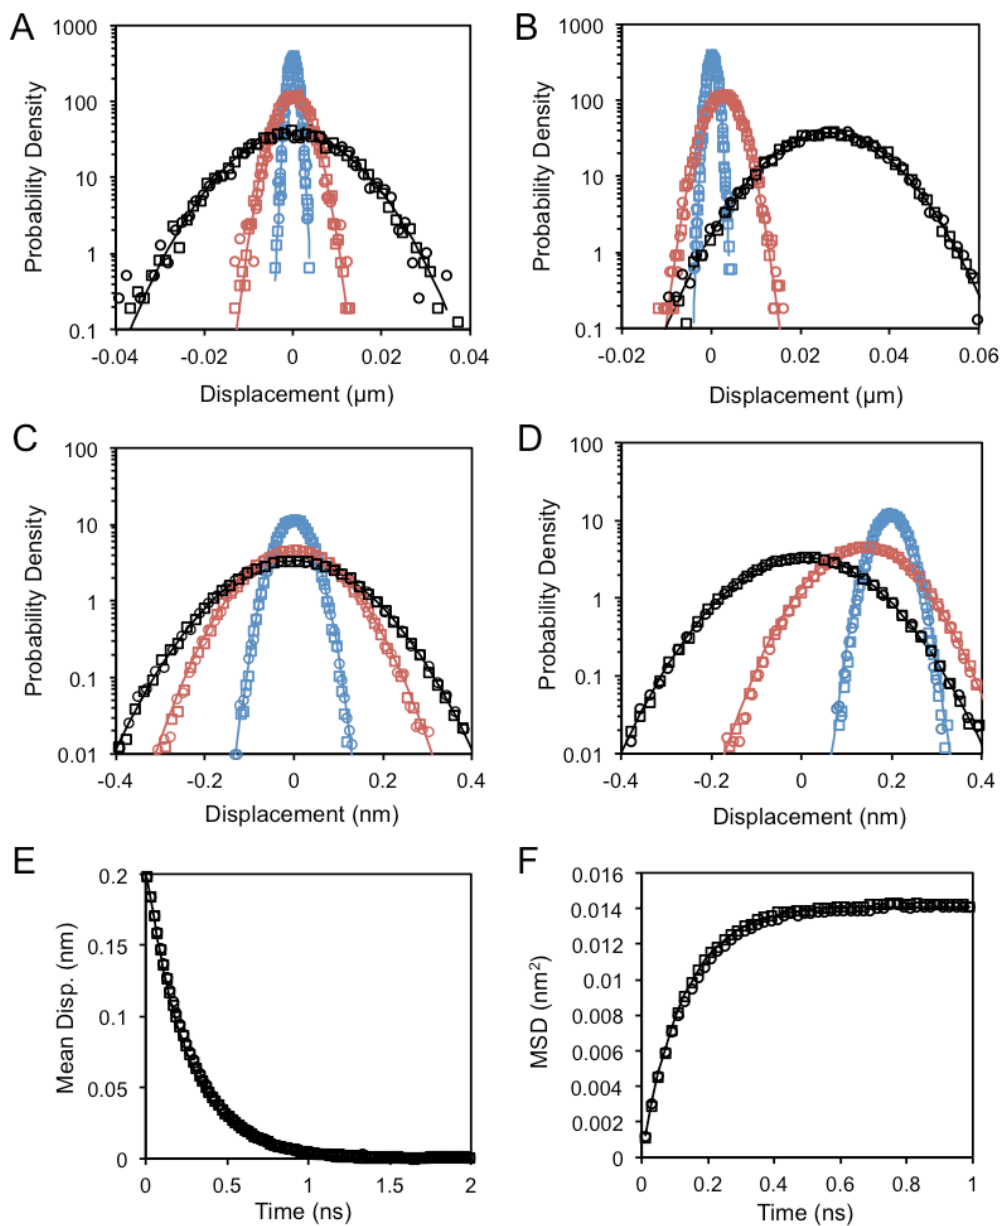

**Fig. S1.** Comparison of our modified MMC algorithm (circles) to previous MMC methods (squares) as well as theoretical expectation (solid lines). A-B) Resulting probability distributions in the absence (A) and presence (B) of a constant external force at 10 ns (blue), 100 ns (red) and 1  $\mu\text{s}$  (black). In each run  $x_0 = 0$ . C-D) Probability distributions for diffusion in a harmonic potential where  $x_0 = 0$  (C) or  $x_0 = 0.2$  nm (D). Distributions were sampled after 10 ps (blue), 100 ps (red), and 1 ns (black). E-F) Starting from  $x_0 = 0.2$  nm, the mean displacement (from  $x = 0$ , E) and the mean-squared displacement (F) were calculated at regular intervals in order to estimate the transition to the predicted steady-state distribution. Theoretical expectation (solid lines) was calculated from Eq. S11 (A and B), Eq. S12 (C and D), Eq. S13 (E), or Eq. S14 (F).

**Figure S2**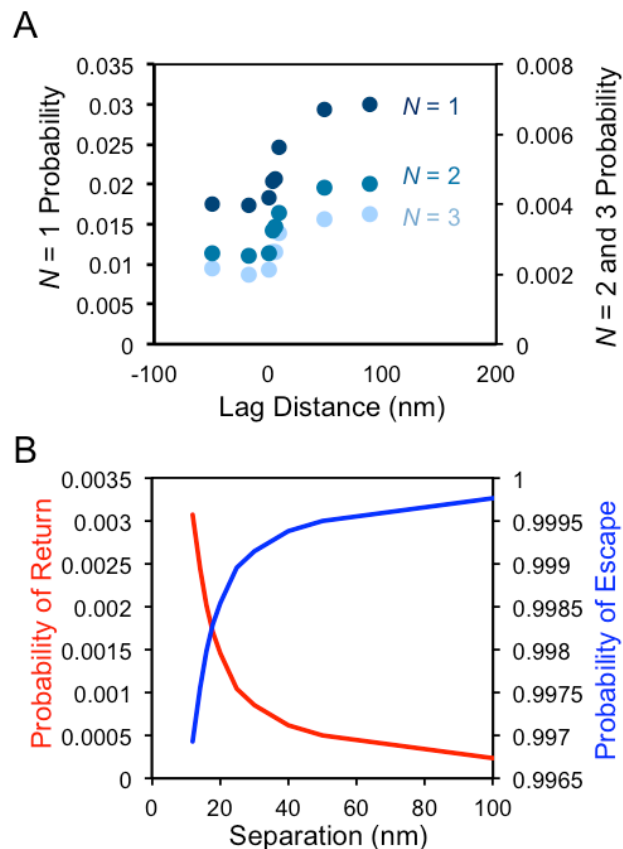

**Fig. S2.** A) Probabilities of reaching  $N=1$ , 2, or 3 zones within the binding radius for binding simulations where the centroid starting position was randomly selected from points along a sphere with radius  $R=10$  nm, centered at the centroid of the subunit of interest in the microtubule lattice. Randomization eliminated any potential spatial bias in the positions of diffusive arrivals. Similar to the trend seen for non-randomized starting positions, free subunits bind more efficiently to lagging protofilaments compared to leading. B) The probability of escaping (diffusing away before binding, blue line) and the probability of return (to  $R=10$  nm separation, red line) as a function of center-to-center separation distance. The probability of escape rapidly increases with separation distance within the range equal to the diameter of the microtubule ( $\sim 25$  nm), suggesting that the longer protofilaments could enhance binding to lagging protofilaments by inhibiting escape.

**Figure S3**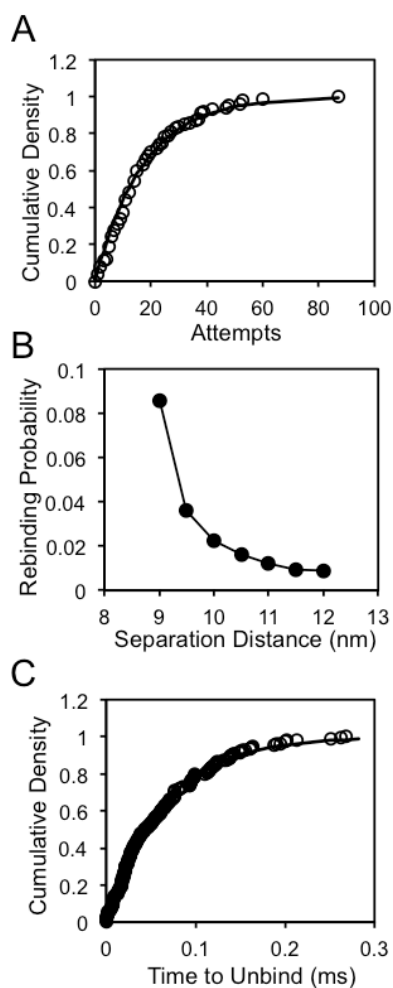

**Fig. S3.** A) Cumulative density function of the number of times that bound subunits reach the  $N = 0$  (all zones separated by greater than the binding radius) state prior to diffusing to a center-to-center distance of  $R = 11$  nm. The line is best fit of a geometric distribution (Kolmogorov-Smirnov test,  $p > 0.05$ ), with mean  $\mu = 17.7$ . The fit of the a geometric distribution indicates that a subunit has an escape probability of 0.06 ( $P = 1/\mu$ ) or 94% chance of rebinding each occurrence of  $N = 0$ . B) The probability that a subunit completely rebinds ( $N = 3$ ) before diffusing away to a 400 nm center-to center distance as a function of the subunit separation distance. Because diffusing subunits maintain rotational correlation between  $N = 0$  and the unbinding distance, units are more likely to rebind compared to a random orientation. The probability decreases the further a subunit is allowed to separate from the protofilament of interest. We defined the unbinding distance by the separation where the probability of rebinding decayed to  $< 0.01$ , which was around 11 nm. As the minimum attainable center-to-center distance of bound units is 8 nm, units diffuse  $\sim 3$  nm before being considered unbound. C) Cumulative density function of the times from the point of first complete binding ( $N = 3$ ) to return to a separation of  $R = 11$  nm. Using this distance criterion for unbinding, the unbinding times fit with the expected exponential distribution, fit line, (Kolmogorov-Smirnov test,  $p = 0.82$ ) for a first-order rate.

**Figure S4**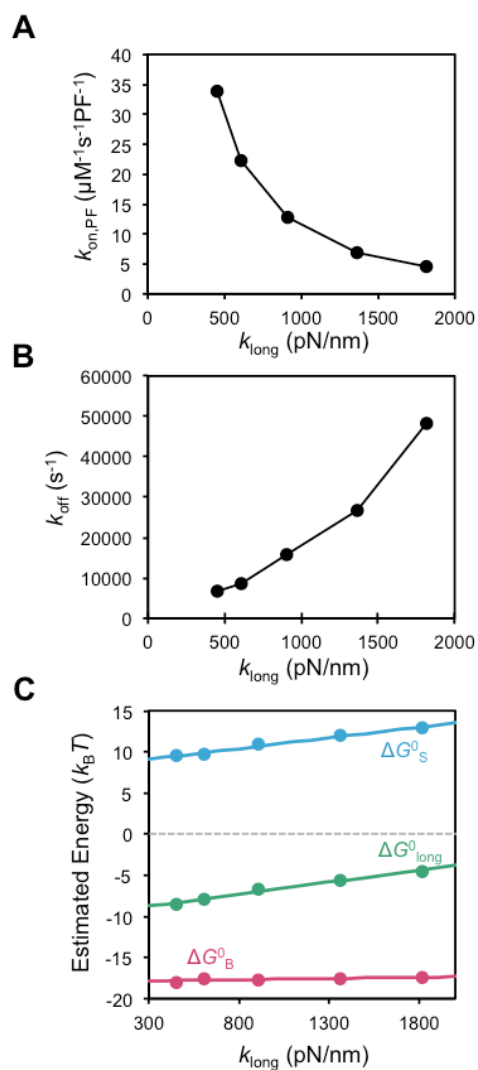

**Fig. S4.** Kinetic and thermodynamic estimates for longitudinal bonds of varying stiffness are shown. Estimated on-rate constant (A) and off-rate (B) as a function of the stiffness of the longitudinal bond. All simulations are longitudinal bond only with constant total bond energy ( $U_{\text{long}} = -20.4 k_{\text{B}}T$ ). C) The standard free energy ( $\Delta G_{\text{long}}^0$ , green), intrinsic bond strength ( $\Delta G_{\text{B}}^0$ , magenta) and entropic penalty of binding ( $\Delta G_{\text{S}}^0$ , blue) are shown as a function of the longitudinal bond stiffness. All trend lines are linear best fit.

Figure S5

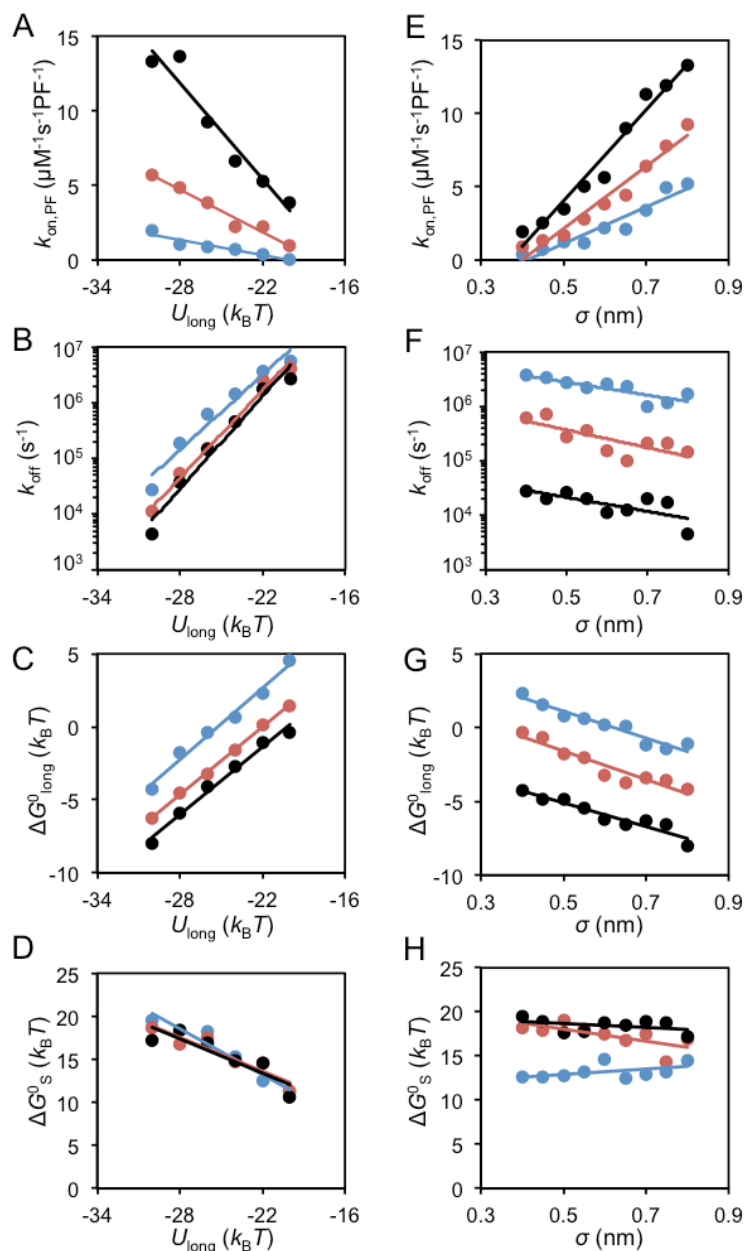

**Fig. S5.** Kinetic and thermodynamic trends with varying  $U_{\text{long}}$  (left) and  $\sigma$  (right) used to define the Lennard-Jones potential. For each condition 100,000 near-field binding runs and 10 unbinding runs were performed. A-D) For each value of  $U_{\text{long}}$ ,  $\sigma = 0.4$  nm (blue), 0.6 nm (red), or 0.8 nm (black). E-H) For each value of  $\sigma$ ,  $U_{\text{long}} = -22 k_B T$  (blue),  $-26 k_B T$  (red), or  $-30 k_B T$  (black). We found that using  $U_{\text{long}} = -30 k_B T$  and  $\sigma = 0.6$  nm resulted in  $\Delta G^0_{\text{long}} \approx -6.8 k_B T$ , therefore these values were used to estimate  $k_{\text{on,PF}}$  and the on-rate penalties for each local condition. All trend lines are linear best fit, except for  $k_{\text{off}}$  which is exponential.

**Figure S6**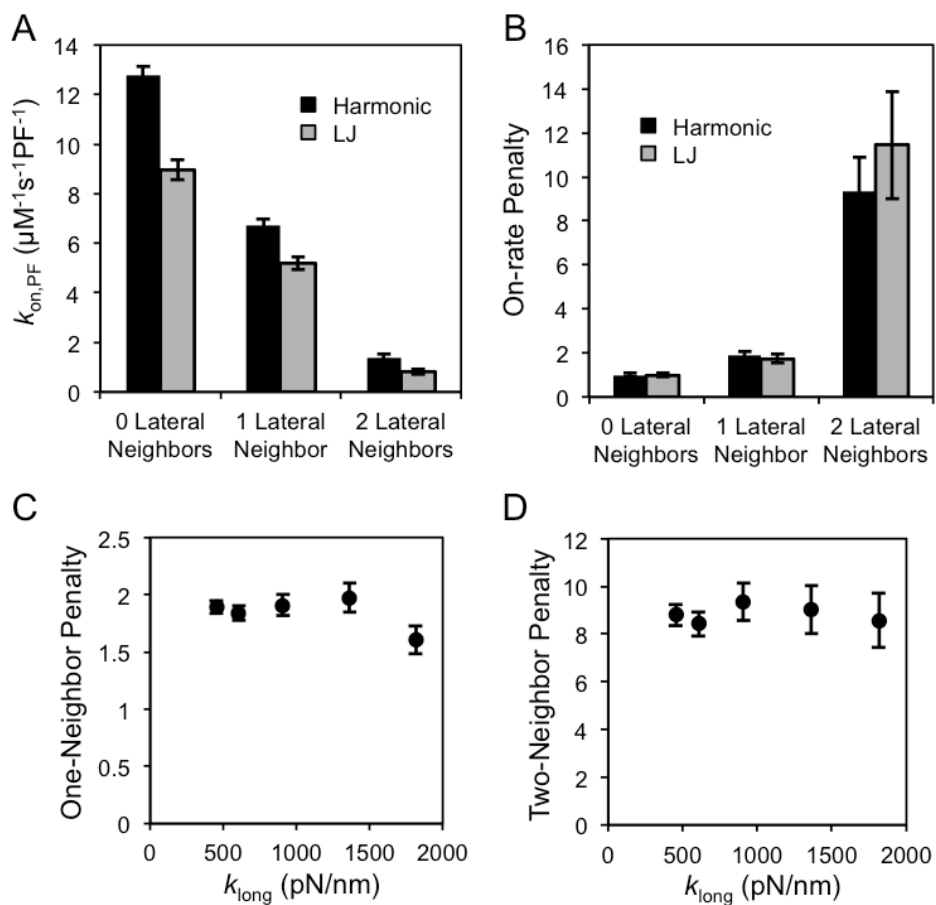

**Fig. S6.** A) Estimated on-rate constants in each local condition are shown when modeling the interaction potential as a harmonic or Lennard-Jones potential (LJ). Parameters for LJ potential were fit such that  $\Delta G_{long}^0$  was equal to that using the harmonic. B) On-rate penalties for different potential shapes in each local condition. One-neighbor (C) and two-neighbor (D) on-rate penalties for a range of longitudinal bond stiffness values (harmonic spring constant). While the on-rate estimates are sensitive to the bond stiffness (Fig. 7A), the on-rate penalties are independent of the bond stiffness. All error bars are 95% confidence interval.

**Supporting Tables****Table S1 – Model estimated kinetics and thermodynamics for F-actin.**

|                                                               | <b>Leading PF<br/>0 LN</b> | <b>Lagging PF<br/>½ LN</b> | <b>Lagging PF<br/>1 LN</b> |
|---------------------------------------------------------------|----------------------------|----------------------------|----------------------------|
| $k_{on,PF}$ ( $\mu\text{M}^{-1}\text{s}^{-1}\text{PF}^{-1}$ ) | 13.7                       | 10.7                       | 9.4                        |
| $k_{off}$ ( $\text{s}^{-1}$ )                                 | $35 \times 10^3$           | 320                        | < 42                       |
| $\Delta G^0_B$ ( $k_B T$ )                                    | -16.1                      | -21.5                      | -28.5                      |
| $\Delta G^0$ ( $k_B T$ )                                      | -6.0                       | -10.4                      | < -12.3                    |
| $\Delta G^0_S$ ( $k_B T$ )                                    | +10.1                      | +11.1                      | < +16.2                    |

**Table S2 – Summary of simulation results with lateral bond only.**

|                                                               | <b>Lateral Bond Only, no Longitudinal Bond</b> |                            |
|---------------------------------------------------------------|------------------------------------------------|----------------------------|
|                                                               | <b>1 Lateral Neighbor</b>                      | <b>2 Lateral Neighbors</b> |
| $k_{on,PF}$ ( $\mu\text{M}^{-1}\text{s}^{-1}\text{PF}^{-1}$ ) | 0.15                                           | 0.10                       |
| $k_{off}$ ( $\text{s}^{-1}$ )                                 | $10^7$                                         | $7 \times 10^6$            |
| $\Delta G^0_B$ ( $k_B T$ )                                    | -0.44                                          | -3.4                       |
| $\Delta G^0$ ( $k_B T$ )                                      | +4.4                                           | +4.3                       |
| $\Delta G^0_S$ ( $k_B T$ )                                    | +4.8                                           | +7.7                       |
